# Supplementary material for: Applications of lipidomics in marine organisms: progress, challenges and future perspectives
Source: Royal Society of Chemistry journal article supplement (doi:10.1039/d2mo00012a), 2022-03-16
Supplement: d2mo00012a1.pdf [file d2mo00012a1.pdf]

**Supplementary Table S1:** Lipid classes identified in macroalgae, microalgae and halophyte, extraction, and identification methods. \*Freshwater species.

| Algae      | Species name                        | Phylum     | Sample origin                                                       | Lipid extraction                                       | Compound identification                  | Lipid classes identified                                                                    | Lipidomics precision level | Study objective                                            | Reference                         |
|------------|-------------------------------------|------------|---------------------------------------------------------------------|--------------------------------------------------------|------------------------------------------|---------------------------------------------------------------------------------------------|----------------------------|------------------------------------------------------------|-----------------------------------|
| Macroalgae | <i>Bifurcaria bifurcata</i>         | Ochrophyta | Wild                                                                | Bligh & Dyer, 1959 <sup>1</sup>                        | LC(HILIC)-MS and MS/MS                   | MGDG, DGDG, SQDG, PC, PE, PG, PI, DGTS, DGTA                                                | Lipid molecular species    | Characterization and bioprospection (antioxidant activity) | Santos et al. 2020 <sup>2</sup>   |
|            | <i>Lobophora</i> sp.                | Ochrophyta | Wild                                                                | Bligh & Dyer, 1959 <sup>1</sup>                        | TLC; GC-FID and HPLC-HRMS - LC/MS-IT-TOF | PI; PC; PG; PA; MGDG; DGDG; SQDG; DGTA; DGTS                                                | Lipid molecular species    | Bioprospection (anti-inflammatory activity)                | Pham et al. 2020 <sup>3</sup>     |
|            | <i>Saccharina latissima</i>         | Ochrophyta | Aquaculture                                                         | Bligh & Dyer, 1959 <sup>1</sup>                        | LC(HILIC)-MS and MS/MS                   | DGDG, DGMG, MGDG, MGMG, SQDG, SQMG, LPA, PA, LPC, PC, LPE, PE, LPG, PG, LPI, PI, MGTS, DGTS | Lipid molecular species    | Ecology (geographical origin)                              | Monteiro et al <sup>4</sup>       |
|            | <i>Sargassum muticum</i>            | Ochrophyta | Wild                                                                | Bligh & Dyer, 1959 <sup>1</sup>                        | LC(HILIC)-MS and MS/MS                   | MGDG, MGMG, DGDG, SQDG, LPC, PC, LPE, PE, LPG, PG, PI, DGTS, DGTA                           | Lipid molecular species    | Characterization and bioprospection (antioxidant activity) | Santos et al. 2020 <sup>2</sup>   |
|            | <i>Undaria pinnatifida</i> (Wakame) | Ochrophyta | Not applicable (bought, as dried chunks, from local grocery stores) | Bligh & Dyer, 1959 <sup>1</sup>                        | HILIC-ESI-FTMS and RPLC-ESI-MS           | SQDG; SQMG; DGDG; DGMG; PG; LPG; PI; PA; PE; PC; LPC                                        | Lipid molecular species    | Characterization                                           | Coniglio et al. 2021 <sup>5</sup> |
|            | <i>Gracilariopsis lemaneiformis</i> | Rhodophyta | Aquaculture                                                         | Methanol, methyl tert-butyl ether, isopropanol/acetone | LC-MS/MS                                 | MGDG, ceramides, SQDG, PC, DGDG (most)                                                      | Lipid molecular species    | Ecology (global warming)                                   | Zhang et al. 2020 <sup>6</sup>    |

|                             |             |                      |                                          |                        | abundant)                                                                             |                         |                                                                                        |                                    |
|-----------------------------|-------------|----------------------|------------------------------------------|------------------------|---------------------------------------------------------------------------------------|-------------------------|----------------------------------------------------------------------------------------|------------------------------------|
| <i>Gracilaria sp.</i>       | Rhodophyta  | Aquaculture          | Bligh & Dyer, 1959 <sup>1</sup>          | LC(HILIC)-MS and MS/MS | MGDG, DGDG, SQMG, SQDG, LPC, PC, LPE, PE, PA, PI-Cer, MGTS, DGTS                      | Lipid molecular species | Characterization and bioprospection (antiproliferative and anti-inflammatory activity) | da Costa et al. 2017 <sup>7</sup>  |
| <i>Grateloupia turuturu</i> | Rhodophyta  | Wild                 | Modified Bligh & Dyer, 1959 <sup>1</sup> | LC(HILIC)-MS and MS/MS | DGTS, MGTS, MGDG, MGMG, DGDG, DGMG, SQDG, SQMG, PC, LPC, PE, LPE, PG, LPG, PA, PI-Cer | Lipid molecular species | Bioprospection (antioxidant and anti-inflammatory activity)                            | da Costa et al. 2021 <sup>8</sup>  |
| <i>Palmaria palmata</i>     | Rhodophyta  | Aquaculture          | Bligh & Dyer, 1959 <sup>1</sup>          | LC(HILIC)-MS and MS/MS | SQMG, SQDG, MGMG, MGDG, DGMG, DGDG, LPC, PC, LPE, PE, LPG, PG, PI, PA, PI-Cer         | Lipid molecular species | Characterization and bioprospection (antioxidant activity)                             | Lopes et al. 2019 <sup>9</sup>     |
| <i>Porphyra dioica</i>      | Rhodophyta  | Aquaculture          | Bligh & Dyer, 1959 <sup>1</sup>          | LC(HILIC)-MS and MS/MS | MGDG, DGDG, SQMG, SQDG, PA, PG, LPG, PC, LPC, PE, PI, PI-Cer, DGTS                    | Lipid molecular species | Characterization                                                                       | da Costa et al. 2018 <sup>10</sup> |
| <i>Codium tomentosum</i>    | Chlorophyta | Wild and Aquaculture | Bligh & Dyer, 1959 <sup>1</sup>          | LC(HILIC)-MS and MS/MS | MGMG, MGDG, DGMG, DGDG, SQMG, SQDG, LPG, PG, LPC, PC, LPE, PE, LPI, PI, MGTS, DGTS    | Lipid molecular species | Characterization and bioprospection (antioxidant activity)                             | Rey et al. 2020 <sup>11</sup>      |
| <i>Ulva rigida</i>          | Chlorophyta | Aquaculture          | Bligh & Dyer, 1959 <sup>1</sup>          | LC(HILIC)-MS and MS/MS | SQMG, SQDG, MGMG, MGDG, DGMG, DGDG, MGTS, DGTS, LPG, PG, LPI, PI, LPC, PC, LPE, PE    | Lipid molecular species | Characterization                                                                       | Lopes et al. 2019 <sup>12</sup>    |

|                                      |                                 |             |                                 |                                                                   |                                                               |                                                                |                         |                                                      |                                     |
|--------------------------------------|---------------------------------|-------------|---------------------------------|-------------------------------------------------------------------|---------------------------------------------------------------|----------------------------------------------------------------|-------------------------|------------------------------------------------------|-------------------------------------|
| <b>Microalgae</b>                    | <i>Ceratoneis closterium</i>    | Ochrophyta  | Aquaculture                     | Bligh & Dyer, 1959 <sup>1</sup>                                   | C <sub>18</sub> RP-UPLC-ESI-Q-TOF-MS <sup>E</sup>             | Ceramides                                                      | Lipid molecular species | Characterization                                     | Li et al. 2017 <sup>13</sup>        |
|                                      | <i>Ceratoneis</i> sp.           | Ochrophyta  | Aquaculture                     | Bligh & Dyer, 1959 <sup>1</sup>                                   | C <sub>18</sub> RP-UPLC-ESI-Q-TOF-MS <sup>E</sup>             | Ceramides                                                      | Lipid molecular species | Characterization                                     | Li et al. 2017 <sup>13</sup>        |
|                                      | <i>*Conticribra weissflogii</i> | Ochrophyta  | Aquaculture                     | Bligh & Dyer, 1959 <sup>1</sup>                                   | C <sub>8</sub> UPLC-(ESI)-Q-TOF-MS <sup>n</sup>               | DGCC; PC; MGDG; DGDG; SQDG; PG; TG                             | Lipid species           | Growth conditions                                    | Li et al. 2016 <sup>14</sup>        |
|                                      |                                 | Ochrophyta  | Aquaculture                     | Bligh & Dyer, 1959 <sup>1</sup>                                   | C <sub>18</sub> RP-UPLC-ESI-Q-TOF-MS <sup>E</sup>             | Ceramides; Monosaccharide ceramides                            | Lipid molecular species | Characterization                                     | Li et al. 2017 <sup>13</sup>        |
|                                      | <i>Microchloropsis gaditana</i> | Ochrophyta  | Aquaculture                     | Bligh & Dyer, 1959 <sup>1</sup> ; <i>n</i> -Heptane; bead milling | GC-FID; C <sub>18</sub> UPLC-ESI-MS and MS/MS                 | LPC; PC; DGTS; MGTG; DGDG; DGMG; MGDG; PG; PI; SQDG; SQMG; FFA | Lipid molecular species | Characterization and different extraction procedures | Cauchie et al. 2021 <sup>15</sup>   |
|                                      | <i>Amphora</i> sp.              | Ochrophyta  | Aquaculture                     | Bligh & Dyer, 1959 <sup>1</sup>                                   | C <sub>18</sub> RP-UPLC-ESI-Q-TOF-MS <sup>E</sup>             | Ceramides                                                      | Lipid molecular species | Characterization                                     | Li et al. 2017 <sup>13</sup>        |
|                                      |                                 | Ochrophyta  | Aquaculture                     | CHCl <sub>3</sub> /CH <sub>3</sub> OH (1:1, v/v)                  | C <sub>18</sub> RP-UPLC-ESI-Q-TOF-MS <sup>E</sup>             | DGTS; DGTA                                                     | Lipid molecular species | Characterization                                     | Li et al. 2017 <sup>16</sup>        |
|                                      | <i>Chaetoceros gracilis</i>     | Ochrophyta  | Aquaculture                     | Folch et al. 1957 <sup>17</sup>                                   | HPLC-ESI-TOF-MS                                               | DGCC                                                           | Lipid molecular species | Characterization                                     | Cañavate et al. 2016 <sup>18</sup>  |
|                                      | <i>Cyclotella cryptica</i>      | Ochrophyta  | Aquaculture                     | MTBE                                                              | UPLC-ESI-MS <sup>n</sup>                                      | PC; PE; PI; PG; SQDG; DGDG; MGDG; TG                           | Lipid molecular species | Characterization                                     | Cutignano et al. 2016 <sup>19</sup> |
|                                      | <i>Cylindrotheca closterium</i> | Ochrophyta  | Aquaculture                     | Modified gravitational method                                     | GC-FID; HPLC-ESI-TOF-MS and HPLC-ESI-ion-trap-MS <sup>n</sup> | DGDG; MGDG; SQDG; TG                                           | Lipid molecular species | Growth conditions                                    | Wang et al. 2019 <sup>20</sup>      |
| <i>Nannocloropsis oceanica</i>       | Ochrophyta                      | Aquaculture | Bligh & Dyer, 1959 <sup>1</sup> | C <sub>8</sub> UPLC-(ESI)-Q-TOF-MS                                | MGDG; DGDG; SQDG; PG; DGTS; TG                                | Lipid molecular species                                        | Characterization        | Li et al. 2015 <sup>21</sup>                         |                                     |
| <i>Nannocloropsis oceanica</i> IMET1 | Ochrophyta                      | Aquaculture | Folch et al. 1957 <sup>17</sup> | C <sub>18</sub> HPLC-ESI-QqQ-MS                                   | DGTS; PC; PE; PI; PG; MGDG;                                   | Lipid molecular                                                | Growth conditions       | Han et al. 2017 <sup>22</sup>                        |                                     |

|                                 |            |             |                                                                                                                                                                                                                     |                                                                   |                                                                         |                         |                                                      |                                     |
|---------------------------------|------------|-------------|---------------------------------------------------------------------------------------------------------------------------------------------------------------------------------------------------------------------|-------------------------------------------------------------------|-------------------------------------------------------------------------|-------------------------|------------------------------------------------------|-------------------------------------|
|                                 |            |             |                                                                                                                                                                                                                     |                                                                   | DGDG; SQDG                                                              | species                 |                                                      |                                     |
|                                 | Ochrophyta | Aquaculture | MTBE                                                                                                                                                                                                                | HILIC-ESI-MS <sup>n</sup> ; GC-FID                                | MGDG; DGDG; SQDG; DGTS; MGTS; PG; PI; PE; PC; LPC                       | Lipid molecular species | Characterization                                     | Meng et al. 2017 <sup>23</sup>      |
| <i>Nannochloropsis oceanica</i> | Ochrophyta | Aquaculture | Folch et al. 1957 <sup>17</sup> , CH <sub>2</sub> Cl <sub>2</sub> /CH <sub>3</sub> OH, CH <sub>2</sub> Cl <sub>2</sub> /ethanol, ethanol, ethanol assisted by ultrasonic bath, ethanol assisted by ultrasonic probe | HILIC-HR-ESI-MS and MS/MS                                         | SQDG; SQMG; DGTS; MGTS; PG; PI; PE; PC; LPC; PI-Cer                     | Lipid molecular species | Characterization and different extraction procedures | Melo et al. 2021 <sup>24</sup>      |
|                                 | Ochrophyta | Aquaculture | Folch et al. 1957 <sup>17</sup>                                                                                                                                                                                     | LQ; FT-ICR-MS                                                     | DGTS; MGTS; DGDG; MGDG; MGDG; SQDG; PG; DG; TG                          | Lipid species           | Growth conditions                                    | Willetteet al. 2018 <sup>25</sup>   |
| <i>Nannochloropsis salina</i>   | Ochrophyta | Aquaculture | MTBE                                                                                                                                                                                                                | UPLC-ESI-MS <sup>n</sup>                                          | MGDG; DGDG; SQDG; PG; PI; PE; PC; TG                                    | Lipid molecular species | Characterization                                     | Cutignano et al. 2016 <sup>19</sup> |
|                                 | Ochrophyta | Aquaculture | Folch et al. 1957 <sup>17</sup>                                                                                                                                                                                     | GC-MS; LQ; FT-ICR MS                                              | MGTS; DGTS; MGDG; DGDG; SQDG; PG; DG; TG; FFA                           | Lipid species           | Growth conditions                                    | Gill et al. 2018 <sup>26</sup>      |
| <i>Nannochloropsis</i> sp.      | Ochrophyta | Aquaculture | Folch et al. 1957 <sup>17</sup>                                                                                                                                                                                     | Off-line SPE-Si; Off-line TLC; LC-ESI-QqQ-MS <sup>n</sup> ; GC-MS | DGDG; MGDG; SQDG; PG; LPG; LPC; LPE; PC; PE; PI                         | Lipid species           | Characterization                                     | Yao et al. 2015 <sup>27</sup>       |
| <i>Nannochloropsis</i> sp. PJ12 | Ochrophyta | Aquaculture | Bligh & Dyer, 1959 <sup>1</sup>                                                                                                                                                                                     | GC-MS; C <sub>18</sub> LC-MS and LC-MS/MS                         | DGDG; DGTS; LPC; LPE; LPG; MGDG; PA; PC; PE; PG; PI; SQDG; TG; DG; FFA; | Lipid molecular species | Growth conditions                                    | Liang et al. 2019 <sup>28</sup>     |
|                                 | Ochrophyta | Aquaculture | Folch et al. 1957                                                                                                                                                                                                   | TLC; GC-FID; ESI-LTQ-XL-MS; HPLC-ESI-QqQ-MS <sup>n</sup>          | SQDG; MGDG; DGDG; PG; PI; PE; PC; DGTS; DG; TG                          | Lipid molecular species | Characterization and Growth conditions               | Jouhet et al. 2017 <sup>29</sup>    |
| <i>Nannochloropsis gaditana</i> | Ochrophyta | Aquaculture | Folch et al. 1957 <sup>17</sup>                                                                                                                                                                                     | HPLC-ESI-                                                         | DGTS                                                                    | Lipid                   | Characterization                                     | Cañavate                            |

|                                                              |            |             |                                                                                                                               |                                                                  |                                                                            |                         |                                        |                                    |
|--------------------------------------------------------------|------------|-------------|-------------------------------------------------------------------------------------------------------------------------------|------------------------------------------------------------------|----------------------------------------------------------------------------|-------------------------|----------------------------------------|------------------------------------|
|                                                              |            |             |                                                                                                                               | TOF-MS                                                           |                                                                            | molecular species       |                                        | et al. 2016 <sup>18</sup>          |
| <i>Nannochloropsis oculata</i>                               | Ochrophyta | Aquaculture | CH <sub>3</sub> OH/CHCl <sub>3</sub> (1:1, v/v);<br>H <sub>2</sub> O/ CH <sub>3</sub> OH/ CHCl <sub>3</sub><br>(3:2:1, v/v/v) | (-) ESI FT-ICR MS; NanoLC-FT-ICR-MS; Online Nano LC-MS and MS/MS | DGDG; DGMG; DGTS; PI-Cer; LPC; LPE; MGDG; MGMTG; PC; PE; PG; PI; SQDG; FFA | Lipid species           | Characterization                       | Liu et al. 2016 <sup>30</sup>      |
|                                                              | Ochrophyta | Aquaculture | Bligh & Dyer, 1959 <sup>1</sup>                                                                                               | TLC; GC-FID; ESI-LTQ-MS <sup>n</sup>                             | MGDG; DGDG; SQDG; SQMG; PG; PC; DGTA; PE; PI; DG; TG                       | Lipid molecular species | Characterization and Growth conditions | Abida et al. 2015 <sup>31</sup>    |
|                                                              | Ochrophyta | Aquaculture | Folch et al. 1957 <sup>17</sup>                                                                                               | TLC; GC-FID; ESI-LTQ-XL-MS; HPLC-ESI-QqQ-MS <sup>n</sup>         | DGDG; MGDG; DGTA; PE; PC; PG; PI; SQDG; DG; TG                             | Lipid molecular species | Characterization and Growth conditions | Jouhet et al. 2017 <sup>29</sup>   |
| <i>Phaeodactylum tricornutum</i>                             | Ochrophyta | Aquaculture | Bligh & Dyer, 1959 <sup>1</sup>                                                                                               | C <sub>18</sub> RP-UPLC-ESI-Q-TOF-MS <sup>E</sup>                | Ceramides; Disaccharide ceramides                                          | Lipid molecular species | Characterization                       | Li et al. 2017 <sup>13</sup>       |
|                                                              | Ochrophyta | Aquaculture | Folch et al. 1957 <sup>17</sup>                                                                                               | HPLC-ESI-TOF-MS                                                  | DGTA                                                                       | Lipid molecular species | Characterization                       | Cañavate et al. 2016 <sup>18</sup> |
|                                                              | Ochrophyta | Aquaculture | Folch et al. 1957 <sup>17</sup>                                                                                               | GC-FID; HPLC-ESI-QqQ-MS and MS/MS                                | SQDG; MGDG; DGDG; PG; PI; PE; PC; DGTA; DG; TG                             | Lipid classes           | Growth conditions                      | Jaussaud et al. 2020 <sup>32</sup> |
| <i>Skeletonema</i> sp.                                       | Ochrophyta | Aquaculture | Bligh & Dyer, 1959 <sup>1</sup>                                                                                               | C <sub>18</sub> RP-UPLC-ESI-Q-TOF-MS <sup>E</sup>                | Trisaccharide ceramides                                                    | Lipid molecular species | Characterization                       | Li et al. 2017 <sup>13</sup>       |
| <i>Skeletonema tropicum</i>                                  | Ochrophyta | Aquaculture | Bligh & Dyer, 1959 <sup>1</sup>                                                                                               | C <sub>18</sub> RP-UPLC-ESI-Q-TOF-MS <sup>E</sup>                | Trisaccharide ceramides                                                    | Lipid molecular species | Characterization                       | Li, et al. 2017 <sup>13</sup>      |
| <i>Skeletonema costatum</i><br><i>Skeletonema</i> SKSPXS0711 | Ochrophyta | Aquaculture | Bligh & Dyer, 1959 <sup>1</sup>                                                                                               | C <sub>18</sub> RP-UPLC-ESI-Q-TOF-MS <sup>E</sup>                | Disaccharide ceramides                                                     | Lipid molecular species | Characterization                       | Li et al. 2017 <sup>13</sup>       |
| <i>Skeletonema costatum</i><br><i>Skeletonema</i> SCXMBO2    | Ochrophyta | Aquaculture | Bligh & Dyer, 1959 <sup>1</sup>                                                                                               | C <sub>18</sub> RP-UPLC-ESI-Q-TOF-MS <sup>E</sup>                | Ceramides; Disaccharide ceramides                                          | Lipid molecular species | Characterization                       | Li et al. 2017 <sup>13</sup>       |

|                                   |             |             |                                                                       |                                                                   |                                                                     |                         |                                        |                                     |
|-----------------------------------|-------------|-------------|-----------------------------------------------------------------------|-------------------------------------------------------------------|---------------------------------------------------------------------|-------------------------|----------------------------------------|-------------------------------------|
| <i>*Stephanodiscus</i> sp.        | Ochrophyta  | Aquaculture | Bligh & Dyer, 1959 <sup>1</sup>                                       | C <sub>18</sub> RP-UPLC-ESI-Q-TOF-MS <sup>E</sup>                 | Ceramides                                                           | Lipid molecular species | Characterization                       | Li et al. 2017 <sup>13</sup>        |
| <i>Thalassiosira pseudonana</i>   | Ochrophyta  | Aquaculture | Bligh & Dyer, 1959 <sup>1</sup>                                       | C <sub>18</sub> RP-UPLC-ESI-Q-TOF-MS <sup>E</sup>                 | Ceramides                                                           | Lipid molecular species | Characterization                       | Li et al. 2017 <sup>13</sup>        |
|                                   | Ochrophyta  | Aquaculture | Folch et al. 1957 <sup>17</sup>                                       | HPLC-ESI-TOF-MS                                                   | DGCC                                                                | Lipid molecular species | Characterization                       | Cañavate et al. 2016 <sup>18</sup>  |
| <i>Thalassiosira weissflogii</i>  | Ochrophyta  | Aquaculture | MTBE                                                                  | UPLC-ESI-MS <sup>n</sup>                                          | MGDG; DGDG; SQDG; PG; PI; PE; PC; TG                                | Lipid molecular species | Characterization                       | Cutignano et al. 2016 <sup>19</sup> |
| <i>*Chlamydomonas reinhardtii</i> | Chlorophyta | Aquaculture | CH <sub>3</sub> OH:CHCl <sub>3</sub> :H <sub>2</sub> O (5:2:2, v/v/v) | Nano ESI-MS <sup>n</sup> LTQ                                      | DGTS; MGTS; MGDG; DGDG; SQDG; PG; PI; TG                            | Lipid molecular species | Growth conditions                      | Yang et al. 2015 <sup>33</sup>      |
|                                   | Chlorophyta | Aquaculture | Folch et al. 1957 <sup>17</sup>                                       | Off-line SPE-Si; Off-line TLC; LC-ESI-QqQ-MS <sup>n</sup> ; GC-MS | DGDG; MGDG; SQDG; PG; LPG; LPE; PC; PE; PI                          | Lipid species           | Characterization                       | Yao et al. 2015 <sup>27</sup>       |
|                                   | Chlorophyta | Aquaculture | Folch et al. 1957 <sup>17</sup>                                       | C8 RP-UPLC-ESI-LTQ-Orbitrap-MS                                    | MGDG; DGDG; SQDG; PE; PG; PI; DGTS                                  | Lipid molecular species | Characterization and growth conditions | Yang et al. 2018 <sup>34</sup>      |
|                                   | Chlorophyta | Wild        | Not applicable                                                        | MALDI-MS and MALDI-MS/MS                                          | DGTS, MGDG, DGDG, TG                                                | Lipid species           | Ecology (herbicide exposure)           | Shanta et al. 2021 <sup>35</sup>    |
| <i>*Chlorella</i> sp.             | Chlorophyta | Aquaculture | Folch et al. 1957 <sup>17</sup>                                       | LC-ESI-LTQ-MS/MS; GC-MS                                           | MGDG; DGDG; SQDG; PG; PE; PC; DGTS                                  | Lipid molecular species | Growth conditions                      | White et al. 2019 <sup>36</sup>     |
| <i>*Chlorella vulgaris</i>        | Chlorophyta | Aquaculture | Folch et al. 1957 <sup>17</sup>                                       | HILIC-HR-ESI-MS and MS/MS; GC-MS                                  | PC; LPC; PE; LPE; PG; PI; DGDG; DGMG; MGDG; MGMG; SQDG; Cer; PI-Cer | Lipid molecular species | Growth conditions and Bioprospection   | Couto et al. 2021 <sup>37</sup>     |
| <i>*Chlorella vulgaris</i>        | Chlorophyta | Aquaculture | Folch et al. 1957 <sup>17</sup>                                       | Off-line SPE-Si; Off-line TLC; LC-ESI-QqQ-MS <sup>n</sup> ; GC-MS | DGDG; MGDG; SQDG; PG; LPG; LPC; LPE; PC; PE; PI                     | Lipid species           | Characterization                       | Yao et al. 2015 <sup>27</sup>       |

|                                                 |             |             |                                                                                                                                       |                                                                   |                                                                                             |                         |                                     |                                    |
|-------------------------------------------------|-------------|-------------|---------------------------------------------------------------------------------------------------------------------------------------|-------------------------------------------------------------------|---------------------------------------------------------------------------------------------|-------------------------|-------------------------------------|------------------------------------|
| <i>*Chlorococcum amblystomatis</i>              | Chlorophyta | Aquaculture | Folch et al. 1957 <sup>17</sup>                                                                                                       | HILIC-HR-ESI-MS and MS/MS; GC-MS                                  | PC; LPC; PE; LPE; PG; PI; PI-Cer; DGDG; DGMG; MGDG; MGMG; SQDG; SQMG; DGTS; MGTS            | Lipid molecular species | Characterization and Bioprospection | Conde et al. 2021 <sup>38</sup>    |
| <i>*Ettlia oleoabundans</i>                     | Chlorophyta | Aquaculture | CH <sub>3</sub> OH assisted by bead milling followed by 2-ethoxyethanol, hexane:toluene:acetone:CH <sub>3</sub> OH (2:2:1:1, v/v/v/v) | LC-ESI-QToF-MS and LC-MS/MS                                       | MGMG; MGDG; DGDG; SQDG; PA; PG; PI; PC; PE; MG; DG; TG; FFA                                 | Lipid species           | Growth conditions                   | Matich et al. 2018 <sup>39</sup>   |
| <i>*Haematococcus pluvialis</i>                 | Chlorophyta | Aquaculture | CH <sub>3</sub> OH/ CHCl <sub>3</sub> (1:1, v/v); H <sub>2</sub> O/ CH <sub>3</sub> OH/ CHCl <sub>3</sub> (3:2:1, v/v/v)              | (-) ESI FT-ICR MS; NanoLC-FT-ICR-MS; Online Nano LC-MS and MS/MS  | DGDG; DGMG; DGTS; PI-Cer; LPC; MGDG; PC; PE; PG; PI; SQDG; FFA                              | Lipid species           | Characterization                    | Liu et al. 2016 <sup>30</sup>      |
| <i>Picochlorum atomus</i>                       | Chlorophyta | Aquaculture | Folch et al. 1957 <sup>17</sup>                                                                                                       | HPLC-ESI-TOF-MS                                                   | DGTS                                                                                        | Lipid molecular species | Characterization                    | Cañavate et al. 2016 <sup>18</sup> |
|                                                 | Chlorophyta | Aquaculture | Folch et al. 1957 <sup>17</sup>                                                                                                       | Off-line SPE-Si; Off-line TLC; LC-ESI-QqQ-MS <sup>n</sup> ; GC-MS | DGDG; MGDG; SQDG; PG; LPG; LPC; LPE; PC; PE; PI                                             | Lipid species           | Characterization                    | Yao et al. 2015 <sup>27</sup>      |
| <i>Scenedesmus sp.</i>                          | Chlorophyta | Aquaculture | Modified gravitational method                                                                                                         | GC-FID; HPLC-ESI-TOF-MS and HPLC-ESI-ion-trap-MS <sup>n</sup>     | DGDG; MGDG; DGTS; PG; PE; MGTS; TG                                                          | Lipid molecular species | Growth conditions                   | Wang et al. 2019 <sup>20</sup>     |
| <i>Tetraselmis suecica</i>                      | Chlorophyta | Aquaculture | Folch et al. 1957 <sup>17</sup>                                                                                                       | HPLC-ESI-TOF-MS                                                   | DGTA                                                                                        | Lipid molecular species | Characterization                    | Cañavate et al. 2016 <sup>18</sup> |
| <i>Emiliania huxleyi</i> RCC1250 (strain AC453) | Haptophyta  | Aquaculture | Folch et al. 1957 <sup>17</sup>                                                                                                       | HILIC-HR-ESI-MS and MS/MS; GC-MS                                  | SQDG; SQMG; DGDG; MGDG; DGMG; MGMG; DGTS; MGTS; DGCC; PC; PE; MMPE; PDPT; PI; PG; LPC; LPE; | Lipid molecular species | Characterization                    | Aveiro et al. 2020 <sup>40</sup>   |

|                                            |            |             |                                 |                                                                              | sGSL; hGSL;<br>Ceramides                                                      |               |                   |                                      |
|--------------------------------------------|------------|-------------|---------------------------------|------------------------------------------------------------------------------|-------------------------------------------------------------------------------|---------------|-------------------|--------------------------------------|
| <i>Emiliana huxleyi</i> (strain CCMP 3268) | Haptophyta | Aquaculture | Bligh & Dyer, 1959 <sup>1</sup> | Normal and RP-HPLC-Q Exactive hybrid quadrupole - Orbitrap mass spectrometer | DGDG; GlcADG; MGDG; MGMG; SQDG; PC; PG; BLL; DGCC; MGCC; DGTS; DGTA; PDPT     | Lipid species | Growth conditions | Lowenstein et al. 2021 <sup>41</sup> |
| <i>Emiliana huxleyi</i> (strain CCMP 370)  | Haptophyta | Aquaculture | Bligh & Dyer, 1959 <sup>1</sup> | Normal and RP-HPLC-Q Exactive hybrid quadrupole - Orbitrap mass spectrometer | DGDG; GlcADG; MGDG; MGMG; SQDG; PC; PE; PG; BLL; DGCC; MGCC; DGTS; DGTA; PDPT | Lipid species | Growth conditions | Lowenstein et al. 2021 <sup>41</sup> |
| <i>Emiliana huxleyi</i> (strain CCMP 374)  | Haptophyta | Aquaculture | Bligh & Dyer, 1959 <sup>1</sup> | Normal and RP-HPLC-Q Exactive hybrid quadrupole - Orbitrap mass spectrometer | DGDG; GlcADG; MGDG; MGMG; SQDG; PC; PG; BLL; DGCC; MGCC; DGTS; DGTA; PDPT     | Lipid species | Growth conditions | Lowenstein et al. 2021 <sup>41</sup> |
| <i>Emiliana huxleyi</i> (strain CCMP 379)  | Haptophyta | Aquaculture | Bligh & Dyer, 1959 <sup>1</sup> | Normal and RP-HPLC-Q Exactive hybrid quadrupole - Orbitrap mass spectrometer | DGDG; GlcADG; MGDG; MGMG; SQDG; PC; PG; BLL; DGCC; MGCC; DGTS; DGTA; PDPT     | Lipid species | Growth conditions | Lowenstein et al. 2021 <sup>41</sup> |
| <i>Emiliana huxleyi</i> (strain CCMP 3266) | Haptophyta | Aquaculture | Bligh & Dyer, 1959 <sup>1</sup> | Normal and RP-HPLC-Q Exactive hybrid                                         | DGDG; GlcADG; MGDG; MGMG; SQDG; PC; PG; BLL; DGCC;                            | Lipid species | Growth conditions | Lowenstein et al. 2021 <sup>41</sup> |



|                                             |            |             |                                                                |                                                                                                    |                                                                                |                         |                                     |                                        |  |
|---------------------------------------------|------------|-------------|----------------------------------------------------------------|----------------------------------------------------------------------------------------------------|--------------------------------------------------------------------------------|-------------------------|-------------------------------------|----------------------------------------|--|
|                                             |            |             |                                                                | quadrupole - Orbitrap mass spectrometer                                                            | MGCC; DGTS; DGTA; PDPT                                                         |                         |                                     |                                        |  |
| <i>Haptolina ericina</i> (strain CCMP 282)  | Haptophyta | Aquaculture | Bligh & Dyer, 1959 <sup>1</sup>                                | Normal and RP-HPLC-Q Exactive hybrid quadrupole - Orbitrap mass spectrometer                       | DGDG; GlcADG; MGDG; MGMTG; SQDG; PC; PE; PG; BLL; DGCC; MGCC; DGTS; DGTA; PDPT | Lipid species           | Growth conditions                   | Lowenstein et al. 2021 <sup>41</sup>   |  |
| <i>Isochrysis galbana</i> (strain CCMP 715) | Haptophyta | Aquaculture | Bligh & Dyer, 1959 <sup>1</sup>                                | Normal and RP-HPLC-Q Exactive hybrid quadrupole - Orbitrap mass spectrometer                       | DGDG; GlcADG; MGDG; MGMTG; SQDG; PG; BLL; DGCC; MGCC; DGTS; DGTA; PDPT         | Lipid species           | Growth conditions                   | Lowenstein et al. 2021 <sup>41</sup>   |  |
| <i>Isochrysis galbana</i>                   | Haptophyta | Aquaculture | CH <sub>3</sub> CH <sub>3</sub> /CH <sub>3</sub> OH (1:1, v/v) | TLC; <sup>1</sup> H NMR; SPE-C <sub>18</sub> ; C <sub>18</sub> RP-UPLC-ESI-MS <sup>n</sup> ; GC-MS | MGDG; DGDG; GalCer                                                             | Lipid molecular species | Characterization and Bioprospection | de los Reyes et al. 2016 <sup>42</sup> |  |
|                                             | Haptophyta | Aquaculture | Bligh & Dyer, 1959 <sup>1</sup>                                | C <sub>18</sub> RP-UPLC-ESI-Q-TOF-MS <sup>E</sup>                                                  | Monosaccharide ceramides                                                       | Lipid molecular species | Characterization                    | Li et al. 2017 <sup>13</sup>           |  |
| <i>Isochrysis galbana</i> Parke             | Haptophyta | Aquaculture | CHCl <sub>3</sub> /CH <sub>3</sub> OH (1:1, v/v)               | C <sub>8</sub> RP-UPLC-ESI-Q-TOF-MS                                                                | DGCC; MGDG; MGCC; MGMTG; SQDG; SQMG; TG                                        | Lipid molecular species | Growth conditions                   | Huang et al. 2017 <sup>43</sup>        |  |
| <i>Isochrysis zhanjiangensis</i>            | Haptophyta | Aquaculture | Bligh & Dyer, 1959 <sup>1</sup>                                | C <sub>18</sub> RP-UPLC-ESI-Q-TOF-MS <sup>E</sup>                                                  | Monosaccharide ceramides                                                       | Lipid molecular species | Characterization                    | Li et al. 2017 <sup>13</sup>           |  |
| <i>Pavlova gyrans</i> (strain CCMP 608)     | Haptophyta | Aquaculture | Bligh & Dyer, 1959 <sup>1</sup>                                | Normal and RP-HPLC-Q Exactive hybrid                                                               | DGDG; GlcADG; MGDG; MGMTG; SQDG; PG; BLL; DGCC; MGCC;                          | Lipid species           | Growth conditions                   | Lowenstein et al. 2021 <sup>41</sup>   |  |

|                                                  |            |             |                                 |                                                                              |                                                                         |                         |                   |                                      |
|--------------------------------------------------|------------|-------------|---------------------------------|------------------------------------------------------------------------------|-------------------------------------------------------------------------|-------------------------|-------------------|--------------------------------------|
|                                                  |            |             |                                 | quadrupole - Orbitrap mass spectrometer                                      | DGTS; DGTA                                                              |                         |                   |                                      |
| <i>Phaeocystis antarctica</i> (strain CCMP 3314) | Haptophyta | Aquaculture | Bligh & Dyer, 1959 <sup>1</sup> | Normal and RP-HPLC-Q Exactive hybrid quadrupole - Orbitrap mass spectrometer | DGDG; GlcADG; MGDG; MGMG; SQDG; PC; PG; BLL; DGCC; MGCC; DGTS; DGTA     | Lipid species           | Growth conditions | Lowenstein et al. 2021 <sup>41</sup> |
| <i>Phaeocystis globosa</i> (strain CCMP 628)     | Haptophyta | Aquaculture | Bligh & Dyer, 1959 <sup>1</sup> | Normal and RP-HPLC-Q Exactive hybrid quadrupole - Orbitrap mass spectrometer | DGDG; GlcADG; MGDG; MGMG; SQDG; PC; PE; PG; BLL; DGCC; MGCC; DGTS; DGTA | Lipid species           | Growth conditions | Lowenstein et al. 2021 <sup>41</sup> |
| <i>Pleurochrysis carterae</i> (strain CCMP 645)  | Haptophyta | Aquaculture | Bligh & Dyer, 1959 <sup>1</sup> | Normal and RP-HPLC-Q Exactive hybrid quadrupole - Orbitrap mass spectrometer | DGDG; GlcADG; MGDG; MGMG; SQDG; PG; BLL; DGCC; MGCC; DGTS; DGTA         | Lipid species           | Growth conditions | Lowenstein et al. 2021 <sup>41</sup> |
| <i>Pleurochrysis carterae</i>                    | Haptophyta | Aquaculture | Bligh & Dyer, 1959 <sup>1</sup> | C <sub>18</sub> RP-UPLC-ESI-Q-TOF-MS <sup>E</sup>                            | Monosaccharide ceramides                                                | Lipid molecular species | Characterization  | Li et al. 2017 <sup>13</sup>         |
| <i>Prymnesium parvum</i> (strain CCMP 1926)      | Haptophyta | Aquaculture | Bligh & Dyer, 1959 <sup>1</sup> | Normal and RP-HPLC-Q Exactive hybrid quadrupole - Orbitrap mass spectrometer | DGDG; GlcADG; MGDG; MGMG; SQDG; PC; PE; PG; BLL; DGCC; MGCC; PDPT       | Lipid species           | Growth conditions | Lowenstein et al. 2021 <sup>41</sup> |

|                                 |             |             |                                 |                                                   |                                      |                         |                  |                                     |
|---------------------------------|-------------|-------------|---------------------------------|---------------------------------------------------|--------------------------------------|-------------------------|------------------|-------------------------------------|
| <i>Alexandrium minutum</i>      | Myzozoa     | Aquaculture | Bligh & Dyer, 1959 <sup>1</sup> | C <sub>18</sub> RP-UPLC-ESI-Q-TOF-MS <sup>E</sup> | Ceramides                            | Lipid molecular species | Characterization | Li et al. 2017 <sup>13</sup>        |
|                                 | Myzozoa     | Aquaculture | MTBE                            | UPLC-ESI-MS <sup>n</sup>                          | MGDG; DGDG; SQDG; PG; PI; PE; PC; TG | Lipid molecular species | Characterization | Cutignano et al. 2016 <sup>19</sup> |
| <i>Alexandrium tamutum</i>      | Myzozoa     | Aquaculture | MTBE                            | UPLC-ESI-MS <sup>n</sup>                          | MGDG; DGDG; SQDG; PG; PE; PC; TG     | Lipid molecular species | Characterization | Cutignano et al. 2016 <sup>19</sup> |
| <i>Gyrodinium dorsum</i>        | Myzozoa     | Aquaculture | Folch et al. 1957 <sup>17</sup> | HPLC-ESI-TOF-MS                                   | DGCC                                 | Lipid molecular species | Characterization | Cañavate et al. 2016 <sup>18</sup>  |
| <i>Karlodinium veneficum</i>    | Myzozoa     | Aquaculture | Bligh & Dyer, 1959 <sup>1</sup> | C <sub>18</sub> RP-UPLC-ESI-Q-TOF-MS <sup>E</sup> | Ceramides                            | Lipid molecular species | Characterization | Li et al. 2017 <sup>13</sup>        |
| <i>Prorocentrum donghaiense</i> | Myzozoa     | Aquaculture | Bligh & Dyer, 1959 <sup>1</sup> | C <sub>18</sub> RP-UPLC-ESI-Q-TOF-MS <sup>E</sup> | Ceramides; Monosaccharide ceramides  | Lipid molecular species | Characterization | Li et al. 2017 <sup>13</sup>        |
| <i>Chroomonas placoidea</i>     | Cryptophyta | Aquaculture | Folch et al. 1957 <sup>17</sup> | HPLC-ESI-TOF-MS                                   | DGTA                                 | Lipid molecular species | Characterization | Cañavate et al. 2016 <sup>18</sup>  |
| <i>Rhodomonas baltica</i>       | Cryptophyta | Aquaculture | Folch et al. 1957 <sup>17</sup> | HPLC-ESI-TOF-MS                                   | DGTA                                 | Lipid molecular species | Characterization | Cañavate et al. 2016 <sup>18</sup>  |

|                   |                                                 |               |                                                  |                                                                                                                               |                                                                                                                         |                                                          |                               |                                                       |                                             |
|-------------------|-------------------------------------------------|---------------|--------------------------------------------------|-------------------------------------------------------------------------------------------------------------------------------|-------------------------------------------------------------------------------------------------------------------------|----------------------------------------------------------|-------------------------------|-------------------------------------------------------|---------------------------------------------|
|                   | <i>Spirulina platensis</i>                      | Cyanobacteria | NA                                               | CH <sub>3</sub> OH/CHCl <sub>3</sub> (1:1, v/v);<br>H <sub>2</sub> O/ CH <sub>3</sub> OH/ CHCl <sub>3</sub><br>(3:2:1, v/v/v) | RP-UPLC-<br>HRMS (HESI-<br>Q Exactive<br>hybrid<br>quadrupole-<br>Orbitrap<br>mass<br>spectrometer<br>C <sub>18</sub> ) | LPG; PG; PI;<br>SQMG; SQDG;<br>MGMG; MGDG;<br>DGMG; DGDG | Lipid<br>molecular<br>species | Other                                                 | La Barbera,<br>et al.<br>2018 <sup>44</sup> |
|                   | <i>Schizochytrium limacinum</i>                 | Bigyra        | Aquaculture                                      | Folch et al. 1957 <sup>17</sup>                                                                                               | Off-line SPE-<br>Si; Off-line<br>TLC; LC-ESI-<br>QqQ-MS <sup>n</sup> ;<br>GC-MS                                         | DGDG; MGDG;<br>SQDG; PG; LPG;<br>LPC; LPE; PC; PE;<br>PI | Lipid<br>species              | Characterization                                      | Yao et al.<br>2015 <sup>27</sup>            |
| <b>Halophytes</b> | <i>Cakile maritima</i><br>(seeds)               | Tracheophyta  | Wild                                             | CHCl <sub>3</sub> /CH <sub>3</sub> OH /formic<br>acid (1:1:0.1), 1 M KCl,<br>0.2 M H <sub>3</sub> PO <sub>4</sub>             | QTOF-MS-MS                                                                                                              | PL (PC, PE, PG,<br>PA, PI, PS,                           | Lipid<br>species              | Characterization                                      | Zitouni et<br>al. 2016 <sup>45</sup>        |
|                   | <i>Eryngium maritimum</i><br>(seeds)            | Tracheophyta  | Wild                                             | CHCl <sub>3</sub> /CH <sub>3</sub> OH /formic<br>acid (1:1:0.1), 1 M KCl,<br>0.2 M H <sub>3</sub> PO <sub>4</sub>             | QTOF-MS-MS                                                                                                              | PL (PC, PE, PG,<br>PA, PI, PS,                           | Lipid<br>species              | Characterization                                      | Zitouni et<br>al. 2016 <sup>45</sup>        |
|                   | <i>Halimione portulacoides</i>                  | Tracheophyta  | Aquaculture<br>(first<br>collected<br>from wild) | Bligh & Dyer, 1959 <sup>1</sup>                                                                                               | HILIC–LC–Q–<br>Exactive-MS<br>and MS/MS                                                                                 | PC, PE, PG, PI,<br>PA, MGDG,<br>DGDG, SGDG,<br>HexCer    | Lipid<br>molecular<br>species | Characterization                                      | Maciel et<br>al. 2020 <sup>46</sup>         |
|                   | <i>Halimione portulacoides</i><br>(leaves)      | Tracheophyta  | Wild                                             | Bligh & Dyer, 1959 <sup>1</sup>                                                                                               | LC(HILIC)-MS<br>and MS/MS                                                                                               | PC, PE, PG, PI,<br>PA, SQDG,<br>MGDG, DGDG,<br>HexCer    | Lipid<br>molecular<br>species | Characterization<br>(Nutritional<br>purposes)         | Maciel et<br>al. 2018 <sup>47</sup>         |
|                   | <i>Halimione portulacoides</i>                  | Tracheophyta  | Aquaculture<br>(first<br>collected<br>from wild) | Bligh & Dyer, 1959 <sup>1</sup>                                                                                               | HILIC–LC–Q–<br>Exactive-MS<br>and MS/MS                                                                                 | LPC, PC, LPE, PE,<br>PA, PG, PI,<br>DGDG,<br>MGDG,SQDG   | Lipid<br>molecular<br>species | Ecology<br>(manipulation of<br>culture<br>conditions) | Custódio et<br>al. 2020 <sup>48</sup>       |
|                   | <i>Salicornia ramosissima</i>                   | Tracheophyta  | Aquaculture<br>(first<br>collected<br>from wild) | Bligh & Dyer, 1959 <sup>1</sup>                                                                                               | HILIC–LC–Q–<br>Exactive-MS<br>and MS/MS                                                                                 | PC, PE, PG, PI,<br>PA, MGDG,<br>DGDG, SGDG,<br>HexCer    | Lipid<br>molecular<br>species | Characterization                                      | Maciel et<br>al. 2020 <sup>46</sup>         |
|                   | <i>Salicornia ramosissima</i><br>(fresh branch) | Tracheophyta  | Wild                                             | Bligh & Dyer, 1959 <sup>1</sup>                                                                                               | LC(HILIC)-MS<br>and MS/MS                                                                                               | PC, PE, PG, PI,<br>PA, SQDG,<br>MGDG, DGDG,              | Lipid<br>molecular<br>species | Characterization<br>(Nutritional<br>purposes)         | Maciel et<br>al. 2018 <sup>47</sup>         |

---

tips)

HexCer

---

Abbreviations: BLL - Betaine-like lipids; CH<sub>2</sub>Cl<sub>2</sub> –Dichloromethane; CHCl<sub>3</sub> – Chloroform; CH<sub>3</sub>OH – Methanol; DG – Diacylglycerol; DGCC – Diacylglyceryl carboxyhydroxymethylcholine; DGDG – Digalactosyl diacylglycerol; DGMG – Digalactosyl monoacylglycerol; DGTA – Diacylglycerylhydroxymethyl-N,N,N-trimethyl-β-alanine; DGTS – Diacylglyceryl-N,N,N-trimethyl homoserine; FFA – Free fatty acids; GalCer - Galactosylceramide; GlcADG – Glucuronosyldiacylglycerol; H<sub>2</sub>O – Water; H<sub>3</sub>PO<sub>4</sub> – Phosphoric acid; HexCer – Hexosylceramide; hGSL – Host glycosphingolipid; KCl – Potassium chloride; LPA – Lyso-phosphatidic acid; LPC – Lyso-phosphatidylcholine; LPE – Lyso-phosphatidylethanolamine; LPG – Lyso-phosphatidylglycerol; LPI – Lyso-phosphatidylinositol; MG – Monoacylglycerol; MGCC – Monoacylglycerylcarboxyhydroxymethylcholine; MGDG – Monogalactosyl diacylglycerol; MGMG – Monogalactosyl monoacylglycerol; MGTS – Monoacylglyceroltrimethylhomoserine; MMPE – Monomethylphosphatidylethanolamine; MTBE – Methyl tert-butyl ether; PA – Phosphatidic acid; PC – Phosphatidylcholine; PDPT – Phosphatidyldimethylpropanethiol; PE – Phosphatidylethanolamine; PG – Phosphatidylglycerol; PI – Phosphatidylinositol; PI-Cer – Inositolphosphoceramides; PS – Phosphatidylserine; sGSL – Sialic acid glycosphingolipids; SQDG – Sulfolipid sulfoquinovosyl diacylglycerol; SQMG – Sulfoquinovosyl monoacylglycerol; TG – Triacylglycerol.

## References

- 1 E. G. Bligh and W. J. Dyer, A rapid method of total lipid extraction and purification, *Canadian Journal of Biochemistry and Physiology*, 1959, **37**, 911–917.
- 2 F. Santos, J. P. Monteiro, D. Duarte, T. Melo, D. Lopes, E. da Costa and M. R. Domingues, Unraveling the lipidome and antioxidant activity of native *Bifurcaria bifurcata* and invasive *Sargassum muticum* seaweeds: A lipid perspective on how systemic intrusion may present an opportunity, *Antioxidants*, 2020, **9**, 642.
- 3 T. H. Pham, V. T. A. Nguyen, T. T. T. Do, A. D. Do, D. T. Dam, T. T. V. Tran, Q. L. Pham and T. T. Le, Lipidomics and anti-inflammation activity of brown algae, *Lobophora* sp., in Vietnam, *Journal of Chemistry*.
- 4 J. P. Monteiro, F. Rey, T. Melo, A. S. P. Moreira, J.-F. Arbona, J. Skjermo, S. Forbord, J. Funderud, D. Raposo, P. D. Kerrison, M.-M. Perrineau, C. Gachon, P. Domingues, R. Calado and M. R. Domingues, The unique lipidomic signatures of *Saccharina latissima* can be used to pinpoint their geographic origin, *Biomolecules*, 2020, **10**, 107.
- 5 D. Coniglio, M. Bianco, G. Ventura, C. D. Calvano, I. Losito and T. R. I. Cataldi, Lipidomics of the edible brown alga Wakame (*Undaria pinnatifida*) by liquid chromatography coupled to electrospray ionization and tandem mass Spectrometry, *Molecules*, 2021, **26**, 4480.
- 6 X. Zhang, C. Wu, C. Hu, Y. Li, X. Sun and N. Xu, Lipid remodeling associated with chitooligosaccharides-induced heat tolerance of marine macroalgae *Gracilariopsis lemaneiformis*, *Algal Research*, 2020, **52**, 102113.
- 7 E. Da Costa, T. Melo, A. S. P. Moreira, C. Bernardo, L. Helguero, I. Ferreira, M. T. Cruz, A. M. Rego, P. Domingues, R. Calado, M. H. Abreu and M. R. Domingues, Valorization of lipids from *Gracilaria* sp. through lipidomics and decoding of antiproliferative and anti-inflammatory activity, *Marine Drugs*, 2017, **15**, 62.
- 8 E. da Costa, T. Melo, M. Reis, P. Domingues, R. Calado, M. H. Abreu and M. R. Domingues, Polar lipids composition, antioxidant and anti-inflammatory activities of the atlantic red seaweed *Grateloupia turuturu*, *Marine Drugs*, 2021, **19**, 414.
- 9 D. Lopes, T. Melo, J. Meneses, M. H. Abreu, R. Pereira, P. Domingues, A. I. Lillebø, R. Calado and M. R. Domingues, A new look for the red macroalga *Palmaria palmata*: a seafood with polar lipids rich in EPA and with antioxidant properties, *Mar Drugs*, 2019, **17**, 533.
- 10 E. Da Costa, V. Azevedo, T. Melo, A. M. Rego, D. V. Evtuguin, P. Domingues, R. Calado, R. Pereira, M. H. Abreu and M. R. Domingues, High-resolution lipidomics of the early life stages of the red seaweed *Porphyra dioica*, *Molecules*, 2018, **23**, 187.
- 11 F. Rey, P. Cartaxana, T. Melo, R. Calado, R. Pereira, H. Abreu, P. Domingues, S. Cruz and M. R. Domingues, Domesticated populations of *Codium tomentosum* display lipid extracts with lower seasonal shifts than conspecifics from the wild relevance for biotechnological applications of this green seaweed, *Marine Drugs*, 2020, **18**, 188.
- 12 D. Lopes, A. S. Moreira, F. Rey, E. da Costa, T. Melo, E. Maciel, A. Rego, M. H. Abreu, P. Domingues and R. Calado, Lipidomic signature of the green macroalgae *Ulva rigida* farmed in a sustainable integrated multi-trophic aquaculture, *Journal of Applied Phycology*, 2019, **31**, 1369–1381.
- 13 Y. Li, Y. Lou, T. Mu, A. Ke, Z. Ran, J. Xu, J. Chen, C. Zhou, X. Yan, Q. Xu and Y. Tan, Sphingolipids in marine microalgae: Development and application of a mass spectrometric method for global structural characterization of ceramides and glycosphingolipids in three major phyla, *Anal Chim Acta*, 2017, **986**, 82–94.

- 14Y. Li, M. Ye, R. Zhang, J. Xu, C. Zhou and X. Yan, Lipid compositions in diatom *Conticribra weissflogii* under static and aerated culture conditions, *Phycological Research*, 2016, **64**, 281-290.
- 15G. Cauchie, G. Delfau-Bonnet, G. Caulier, A.-L. Hantson, J.-H. Renault and P. Gerbaux, Comprehensive lipid profiling of *Microchloropsis gaditana* by liquid chromatography-(tandem) mass spectrometry: Bead milling and extraction solvent effects, *Algal Research*, 2021, **58**, 102388.
- 16Y. Li, Y. Lou, T. Mu, J. Xu, C. Zhou and X. Yan, Simultaneous structural identification of diacylglyceryl-N-trimethylhomoserine (DGTS) and diacylglycerylhydroxymethyl-N, N, N-trimethyl- $\beta$ -alanine (DGTA) in microalgae using dual Li<sup>+</sup>/H<sup>+</sup> adduct ion mode by ultra-performance liquid chromatography/quadrupole time-of-flight mass spectrometry, *Rapid Communications in Mass Spectrometry*, 2017, **31**, 457–468.
- 17J. Folch, M. Lees and G. H. S. Stanley, A simple method for the isolation and purification of total lipides from animal tissues, *Journal of Biological Chemistry*, 1957, **226**, 497–509.
- 18J. P. Cañavate, I. Armada, J. L. Ríos and I. Hachero-Cruzado, Exploring occurrence and molecular diversity of betaine lipids across taxonomy of marine microalgae, *Phytochemistry*, 2016, **124**, 68–78.
- 19A. Cutignano, E. Luongo, G. Nuzzo, D. Pagano, E. Manzo, A. Sardo and A. Fontana, Profiling of complex lipids in marine microalgae by UHPLC/tandem mass spectrometry, *Algal Research*, 2016, **17**, 348–358.
- 20S. Wang, D. Sirbu, L. Thomsen, N. Kuhnert, M. S. Ullrich and C. Thomsen, Comparative lipidomic studies of *Scenedesmus* sp. (Chlorophyceae) and *Cylindrotheca closterium* (Bacillariophyceae) reveal their differences in lipid production under nitrogen starvation, *J Phycol*, 2019, **55**, 1246–1257.
- 21S. Li, J. Xu, Y. Jiang, C. Zhou, X. Yu, Y. Zhong, J. Chen and X. Yan, Lipidomic analysis can distinguish between two morphologically similar strains of *Nannochloropsis oceanica*, *J Phycol*, 2015, **51**, 264–276.
- 22D. Han, J. Jia, J. Li, M. Sommerfeld, J. Xu and Q. Hu, Metabolic remodeling of membrane glycerolipids in the microalga *Nannochloropsis oceanica* under nitrogen deprivation, *Frontiers in Marine Science*, 2017, **4**, 242.
- 23Y. Meng, X. Cao, C. Yao, S. Xue and Q. Yang, Identification of the role of polar glycerolipids in lipid metabolism and their acyl attribution for TAG accumulation in *Nannochloropsis oceanica*, *Algal Research*, 2017, **24**, 122–129.
- 24T. Melo, A. R. P. Figueiredo, E. da Costa, D. Couto, J. Silva, M. R. Domingues and P. Domingues, Ethanol extraction of polar lipids from *Nannochloropsis oceanica* for food, feed, and biotechnology applications evaluated using lipidomic approaches, *Marine Drugs*, 2021, **19**, 593.
- 25S. Willette, S. S. Gill, B. Dungan, T. M. Schaub, J. M. Jarvis, R. St. Hilaire and F. Omar Holguin, Alterations in lipidome and metabolome profiles of *Nannochloropsis salina* in response to reduced culture temperature during sinusoidal temperature and light, *Algal Research*, 2018, **32**, 79–92.
- 26S. S. Gill, S. Willette, B. Dungan, J. M. Jarvis, T. Schaub, D. M. VanLeeuwen, R. St Hilaire and F. O. Holguin, Suboptimal temperature acclimation affects Kennedy pathway gene expression, lipidome and metabolite profile of *Nannochloropsis salina* during PUFA enriched TAG synthesis, *Mar Drugs*, 2018, **16**, E425.
- 27L. Yao, J. A. Gerde, S.-L. Lee, T. Wang and K. A. Harrata, Microalgae lipid characterization, *J. Agric. Food Chem.*, 2015, **63**, 1773–1787.

- 28J. Liang, S. Iqbal, F. Wen, M. Tong and J. Liu, Phosphorus-induced lipid class alteration revealed by lipidomic and transcriptomic profiling in oleaginous microalga *Nannochloropsis* sp. PJ12, *Mar Drugs*, 2019, **17**, E519.
- 29J. Jouhet, J. Lupette, O. Clerc, L. Magneschi, M. Bedhomme, S. Collin, S. Roy, E. Maréchal and F. Rébeillé, Correction: LC-MS/MS versus TLC plus GC methods: Consistency of glycerolipid and fatty acid profiles in microalgae and higher plant cells and effect of a nitrogen starvation, *Plos one*, 2018, **13**, e0206397.
- 30P. Liu, Y. E. Corilo and A. G. Marshall, Polar lipid composition of biodiesel algae candidates *Nannochloropsis oculata* and *Haematococcus pluvialis* from nano liquid chromatography coupled with negative electrospray ionization 14.5 T Fourier transform ion cyclotron resonance mass spectrometry, *Energy & Fuels*, 2016, **30**, 8270–8276.
- 31H. Abida, L.-J. Dolch, C. Meï, V. Villanova, M. Conte, M. A. Block, G. Finazzi, O. Bastien, L. Tirichine, C. Bowler, F. Rébeillé, D. Petroustos, J. Jouhet and E. Maréchal, Membrane glycerolipid remodeling triggered by nitrogen and phosphorus starvation in *Phaeodactylum tricornutum*, *Plant Physiology*, 2015, **167**, 118–136.
- 32A. Jaussaud, J. Lupette, J. Salvaing, J. Jouhet, O. Bastien, M. Gromova and E. Maréchal, Stepwise biogenesis of subpopulations of lipid droplets in nitrogen starved *Phaeodactylum tricornutum* cells, *Frontiers in Plant Science*, 2020, **11**, 48.
- 33D. Yang, D. Song, T. Kind, Y. Ma, J. Hoefkens and O. Fiehn, Lipidomic analysis of *Chlamydomonas reinhardtii* under nitrogen and sulfur deprivation, *PLoS One*, 2015, **10**, e0137948.
- 34M. Yang, Y. Meng, Y. Chu, Y. Fan, X. Cao, S. Xue and Z. Chi, Triacylglycerol accumulates exclusively outside the chloroplast in short-term nitrogen-deprived *Chlamydomonas reinhardtii*, *Biochim Biophys Acta Mol Cell Biol Lipids*, 2018, **1863**, 1478–1487.
- 35P. V. Shanta, B. Li, D. D. Stuart and Q. Cheng, Lipidomic Profiling of algae with microarray MALDI-MS toward ecotoxicological monitoring of herbicide exposure, *Environ. Sci. Technol.*, 2021, **55**, 10558–10568.
- 36D. A. White, P. A. Rooks, S. Kimmance, K. Tait, M. Jones, G. A. Tarran, C. Cook and C. A. Llewellyn, Modulation of polar lipid profiles in *Chlorella* sp. in response to nutrient limitation, *Metabolites*, 2019, **9**, E39.
- 37D. Couto, T. Melo, T. A. Conde, M. Costa, J. Silva, M. R. M. Domingues and P. Domingues, Chemoplasticity of the polar lipid profile of the microalgae *Chlorella vulgaris* grown under heterotrophic and autotrophic conditions, *Algal Research*, 2021, **53**, 102128.
- 38T. A. Conde, D. Couto, T. Melo, M. Costa, J. Silva, M. R. Domingues and P. Domingues, Polar lipidomic profile shows *Chlorococcum amblystomatis* as a promising source of value-added lipids, *Sci Rep*, 2021, **11**, 4355.
- 39E. Matich, M. Ghafari, E. Camgoz, E. Caliskan, B. Pfeifer, B. Haznedaroglu and G. Atilla-Gokcumen, Time-series lipidomic analysis of the oleaginous green microalga species *Ettlia oleoabundans* under nutrient stress, *Biotechnology for biofuels*, 2018, **11**, 1–15.
- 40S. S. Aveiro, T. Melo, A. Figueiredo, P. Domingues, H. Pereira, I. B. Maia, J. Silva, M. R. Domingues, C. Nunes and A. S. P. Moreira, The polar lipidome of cultured *Emiliania huxleyi*: A source of bioactive lipids with relevance for biotechnological applications, *Biomolecules*, 2020, **10**, 1434.
- 41D. P. Lowenstein, K. Mayers, H. F. Fredricks and B. A. S. Van Mooy, Targeted and untargeted lipidomic analysis of haptophyte cultures reveals novel and divergent nutrient-stress adaptations, *Organic Geochemistry*, 2021, **161**, 104315.



- 42 C. de los Reyes, M. J. Ortega, A. Rodríguez-Luna, E. Talero, V. Motilva and E. Zubía, Molecular characterization and anti-inflammatory activity of galactosylglycerides and galactosylceramides from the microalga *Isochrysis galbana*, *J. Agric. Food Chem.*, 2016, **64**, 8783–8794.
- 43 L. Huang, J. Xu, C. Zong, S. Zhu, M. Ye, C. Zhou, H. Chen and X. Yan, Effect of high temperature on the lipid composition of *Isochrysis galbana* parke in logarithmic phase, *Aquacult Int*, 2017, **25**, 327–339.
- 44 G. La Barbera, M. Antonelli, C. Cavaliere, G. Cruciani, L. Goracci, C. M. Montone, S. Piovesana, A. Laganà and A. L. Capriotti, Delving into the polar lipidome by optimized chromatographic separation, high-resolution mass spectrometry, and comprehensive identification with Lipostar: Microalgae as case study, *Anal. Chem.*, 2018, **90**, 12230–12238.
- 45 M. Zitouni, V. Wewer, P. Dörmann, C. Abdelly and N. Ben Youssef, Quadrupole time-of-flight mass spectrometry analysis of glycerophospholipid molecular species in the two halophyte seed oils: *Eryngium maritimum* and *Cakile maritima*, *Food Chemistry*, 2016, **213**, 319–328.
- 46 E. Maciel, P. Domingues, M. R. M. Domingues, R. Calado and A. Lillebø, Halophyte plants from sustainable marine aquaponics are a valuable source of omega-3 polar lipids, *Food Chemistry*, 2020, **320**, 126560.
- 47 E. Maciel, A. Lillebø, P. Domingues, E. da Costa, R. Calado and M. R. M. Domingues, Polar lipidome profiling of *Salicornia ramosissima* and *Halimione portulacoides* and the relevance of lipidomics for the valorization of halophytes, *Phytochemistry*, 2018, **153**, 94–101.
- 48 M. Custódio, E. Maciel, M. R. Domingues, A. I. Lillebø and R. Calado, Nutrient availability affects the polar lipidome of *Halimione portulacoides* leaves cultured in hydroponics, *Sci Rep*, 2020, **10**, 6583.
