# Supplementary material for: Applications of lipidomics in marine organisms: progress, challenges and future perspectives
Source: Royal Society of Chemistry journal article supplement (doi:10.1039/d2mo00012a), 2022-03-16
Supplement: d2mo00012a2.pdf [file d2mo00012a2.pdf]

**Supplementary Table S2** Lipid classes identified in marine invertebrates, extraction and identification methods.

| Species name                     | Common name               | Phylum   | Part used for analysis | Sample origin | Lipid extraction method             | Compound identification equipment   | Lipid classes identified                                                    | Lipidomics precision level | Study objective   | Reference                            |
|----------------------------------|---------------------------|----------|------------------------|---------------|-------------------------------------|-------------------------------------|-----------------------------------------------------------------------------|----------------------------|-------------------|--------------------------------------|
| <i>Berryteuthis magister</i>     | Schoolmaster gonate squid | Mollusca | Digestive glands       | Wild          | Folch et al. 1957 <sup>1</sup>      | LCMS-IT-TOF & MS/MS                 | MADAG                                                                       | Lipid molecular species    | Bioprospection    | Rybin et al. 2017 <sup>2</sup>       |
| <i>Chlamys islandica</i>         | Iceland scallop           | Mollusca | Digestive gland        | Wild          | Folch et al. 1957 <sup>1</sup>      | UHPLC-HRMS-TOF                      | PC, LPC, DG, TG, CE                                                         | Lipid species              | Other: Toxicology | Gilbert et al. 2020 <sup>3</sup>     |
| <i>Crassostrea hongkongensis</i> | Oyster                    | Mollusca | Digestive gland        | Wild          | METB/C H <sub>3</sub> OH (1:5, v/v) | UHPLC-QTOF-MS & MS/MS               | PC, PE, PI, PG, PS, PA, CL, TG, DG, MG, Cer, SM, Hex2Cer, HexCer, CerP, Car | Lipid molecular species    | Other: Toxicology | Chang & Wang, 2018 <sup>4</sup>      |
| <i>Crassostrea gigas</i>         | Japanese oyster           | Mollusca | Edible part            | Market        | Bligh & Dyer, 1959 <sup>5</sup>     | UHPLC-HILIC-ESI-FTMS                | PC, LPC, PE, LPE                                                            | Lipid species              | Nutrition         | Losito et al. 2018 <sup>6</sup>      |
| <i>Cyclina sinensis</i>          | Clam                      | Mollusca | Edible part            | Market        | Matyash et al. 2008 <sup>7</sup>    | HPLC-QqLIT & MS/MS                  | PC, PE, PS, LPC, LPE                                                        | Lipid molecular species    | Nutrition         | Liu et al. 2017 <sup>8</sup>         |
| <i>Dendronotus robustus</i>      | Robust frond-aeolis       | Mollusca | Whole organism         | Wild          | Folch et al. 1957 <sup>1</sup>      | LCMS-IT-TOF ESI & MS/MS             | CAEP, PE, PC, PS, PI                                                        | Lipid molecular species    | Marine food webs  | Imbs & Grigorchuk, 2019 <sup>9</sup> |
| <i>Dendronotus sp.</i>           | Nudibranch                | Mollusca | Whole organism         | Wild          | Folch et al. 1957 <sup>1</sup>      | LCMS-IT-TOF ESI & MS/MS             | CAEP, PE, PC, PS, PI                                                        | Lipid molecular species    | Marine food webs  | Imbs & Grigorchuk, 2019 <sup>9</sup> |
| <i>Elysia viridis</i>            | Green elysia              | Mollusca | Whole organism         | Wild          | Bligh & Dyer, 1959 <sup>5</sup>     | HPLC-HLIC-Q-Exactive-ESI-MS & MS/MS | MGDG, DGDG, SQDG, SQMG, DGTS, MGTS                                          | Lipid molecular species    | Ecology           | Rey et al. 2017 <sup>10</sup>        |
|                                  | Green elysia              | Mollusca | Whole organism         | Wild          | Bligh & Dyer, 1959 <sup>5</sup>     | HPLC-HLIC-Q-Exactive-ESI-MS & MS/MS | MGDG, MGGMG, DGDG, DGMG, SQDG, SQMG, DGTS,                                  | Lipid molecular species    | Ecology           | Rey et al. 2020 <sup>11</sup>        |

|                                          |                    |          |                                |             |                                                                                                     |                                   |                                                           |                         |                                     |                                    |
|------------------------------------------|--------------------|----------|--------------------------------|-------------|-----------------------------------------------------------------------------------------------------|-----------------------------------|-----------------------------------------------------------|-------------------------|-------------------------------------|------------------------------------|
|                                          |                    |          |                                |             |                                                                                                     |                                   | MGTS, PC, LPC, PE, LPE, PG, LPG, PI, LPI, PS, LPS, PA, SM |                         |                                     |                                    |
| <b><i>Haliotis discus hannai</i> Ino</b> | Japanese abalone   | Mollusca | Gonad, viscera and foot muscle | Aquaculture | Folch et al. 1957 <sup>1</sup>                                                                      | UPLC-ESI-QTOF-MS & MS/MS          | PC, PE, PS, PG, PA, LPA, TG, DG, MG, ST, terpenoids, FA   | Lipid molecular species | Nutrition                           | Zhang et al. 2018 <sup>12</sup>    |
| <b><i>Loligo chinensis</i></b>           | Mitre squid        | Mollusca | Edible part                    | Market      | Folch et al. 1957 <sup>1</sup>                                                                      | NPLC/QExactive-MS & MS/MS         | CAEP, N-CH <sub>3</sub> -CAEP                             | Lipid molecular species | Nutrition                           | Wang et al. 2020 <sup>13</sup>     |
| <b><i>Mactra chinensis</i> Philippi</b>  | Chinese surf clam  | Mollusca | Edible part                    | Market      | Matyash et al. 2008 <sup>7</sup>                                                                    | HPLC-QqLIT & MS/MS                | PC, PE, PS, LPC, LPE                                      | Lipid molecular species | Nutrition                           | Liu et al. 2017 <sup>8</sup>       |
| <b><i>Mactra veneriformis</i> Reeve</b>  | Clam               | Mollusca | Edible part                    | Market      | Matyash et al. 2008 <sup>7</sup>                                                                    | HPLC-QqLIT & MS/MS                | PC, PE, PS, LPC, LPE                                      | Lipid molecular species | Nutrition                           | Liu et al. 2017 <sup>8</sup>       |
| <b><i>Meretrix lyrata</i></b>            | Hard clam          | Mollusca | Soft tissue                    | Wild        | Bligh & Dyer, 1959 <sup>5</sup>                                                                     | HPLC-HRMS-ESI & MS/MS             | PE, PC, PS, PI, PG, CAEP                                  | Lipid molecular species | Nutrition                           | Tran et al. 2019 <sup>14</sup>     |
| <b><i>Meretrix</i></b>                   | Clam               | Mollusca | Edible part                    | Market      | Matyash et al. 2008 <sup>7</sup>                                                                    | HPLC-QqLIT & MS/MS                | PC, PE, PS, LPC, LPE                                      | Lipid molecular species | Nutrition                           | Liu et al. 2017 <sup>8</sup>       |
| <b><i>Mytilus edulis</i></b>             | Common blue mussel | Mollusca | Whole organism                 | Market      | Folch et al. 1957 <sup>1</sup> , Bligh & Dyer, 1959 <sup>5</sup> , Matyash et al. 2008 <sup>7</sup> | HPLC-ESI & MS/MS                  | PC, PE, PS                                                | Lipid molecular species | Other: Extraction method comparison | Yin et al. 2016 <sup>15</sup>      |
|                                          |                    | Mollusca | Edible part                    | Market      | Folch et al. 1957 <sup>1</sup>                                                                      | NPLC-QExactive-MS & MS/MS         | CAEP                                                      | Lipid molecular species | Nutrition                           | Wang et al. 2020 <sup>13</sup>     |
| <b><i>Mytilus galloprovincialis</i></b>  | Galician mussel    | Mollusca | Soft tissue                    | Market      | Bligh & Dyer, 1959 <sup>5</sup>                                                                     | HILIC-ESI-FTMS-Q Exactive & MS/MS | CPE, CAEP, N-CH <sub>3</sub> -CAEP                        | Lipid molecular species | Nutrition                           | Facchini et al. 2016 <sup>16</sup> |

|                                       |                    |          |                      |             |                                 |                                      |                                                                                                              |                         |                          |                                    |
|---------------------------------------|--------------------|----------|----------------------|-------------|---------------------------------|--------------------------------------|--------------------------------------------------------------------------------------------------------------|-------------------------|--------------------------|------------------------------------|
|                                       |                    | Mollusca | Edible part          | Market      | Bligh & Dyer, 1959 <sup>5</sup> | Nano-LC-ESI-MS                       | Free fatty acids                                                                                             | Fatty acids             | Other: Method validation | Rigano et al. 2016 <sup>17</sup>   |
|                                       |                    | Mollusca | Edible part          | Aquaculture | Bligh & Dyer, 1959 <sup>5</sup> | HILIC-ESI-FTMS-Q Exactive & MS/MS    | PC, PE                                                                                                       | Lipid molecular species | Ecology                  | Facchini et al. 2018 <sup>18</sup> |
|                                       |                    | Mollusca | Edible part          | Market      | Bligh & Dyer, 1959 <sup>5</sup> | RP-ESI-FTMS & MS/MS                  | Free fatty acids                                                                                             | Fatty acids             | Nutrition                | Losito et al. 2018 <sup>19</sup>   |
|                                       |                    | Mollusca | Edible part          | Aquaculture | Bligh & Dyer, 1959 <sup>5</sup> | RP-HILIC-IT-TOF-ESI-MS & MS/MS       | FFA, Chol, Vit. D3, WE, Tetraterpene, CE, TG, Polyketide, PA, PI, PS, PE, PnE, LPE, CAEP, PC, PnC, LPC, LPnC | Lipid molecular species | Other: characterization  | Donato et al. 2018 <sup>20</sup>   |
| <b><i>Neptunea cumingi</i></b>        | Neptunea           | Mollusca | Edible part          | Market      | Folch et al. 1957 <sup>1</sup>  | NPLC-QExactive-MS & MS/MS            | CAEP, N-CH <sub>3</sub> -CAEP                                                                                | Lipid molecular species | Nutrition                | Wang et al. 2020 <sup>13</sup>     |
| <b><i>Octopus vulgaris</i></b>        | Common octopus     | Mollusca | Mantle and tentacles | Wild        | Bligh & Dyer, 1959 <sup>5</sup> | UHPLC-HILIC-ESI-FTMS                 | PC, LPC, PE, LPE                                                                                             | Lipid species           | Nutrition                | Losito et al. 2018 <sup>6</sup>    |
| <b><i>Ostrea edulis</i></b>           | Flat oyster        | Mollusca | Edible part          | Market      | Bligh & Dyer, 1959 <sup>5</sup> | UHPLC-HILIC-ESI-FTMS                 | PC, LPC, PE, LPE                                                                                             | Lipid species           | Nutrition                | Losito et al. 2018 <sup>6</sup>    |
| <b><i>Ostrea gigas</i></b>            | Portuguese oyster  | Mollusca | Edible part          | Market      | Folch et al. 1957 <sup>1</sup>  | NPLC-QExactive-MS & MS/MS            | CAEP                                                                                                         | Lipid molecular species | Nutrition                | Wang et al. 2020 <sup>13</sup>     |
| <b><i>Placida dendritica</i></b>      | Dendritic sea slug | Mollusca | Whole organism       | Wild        | Bligh & Dyer, 1959 <sup>5</sup> | HPLC-HILIC-Q-Exactive-ESI-MS & MS/MS | MGDG, DGDG, SQDG, SQMG, DGTS, MGTS, PC, LPC, PE, LPE, PG, LPG, PI, LPI, PS, PA, LPA, SM                      | Lipid molecular species | Ecology                  | Rey et al. 2020 <sup>11</sup>      |
| <b><i>Ruditapes philippinarum</i></b> | Manilla            | Mollusca | Edible               | Market      | Matyash                         | HPLC-QqLIT &                         | PC, PE, PS,                                                                                                  | Lipid                   | Nutrition                | Liu et al.                         |

|                                     |                              |          |                                        |        |                                  |                              |                                              |                         |                  |                                       |
|-------------------------------------|------------------------------|----------|----------------------------------------|--------|----------------------------------|------------------------------|----------------------------------------------|-------------------------|------------------|---------------------------------------|
|                                     |                              |          | part                                   |        | et al. 2008 <sup>7</sup>         | MS/MS                        | LPC, LPE                                     | molecular species       |                  | 2017 <sup>8</sup>                     |
|                                     | clam                         | Mollusca | Edible part                            | Market | Bligh & Dyer, 1959 <sup>5</sup>  | UHPLC-HILIC-ESI-FTMS         | PC, LPC, PE, LPE                             | Lipid species           | Nutrition        | Losito et al. 2018 <sup>6</sup>       |
| <b><i>Saxidomus purpurata</i></b>   | Clam                         | Mollusca | Edible part                            | Market | Matyash et al. 2008 <sup>7</sup> | HPLC-QqLIT & MS/MS           | PC, PE, PS, LPC, LPE                         | Lipid molecular species | Nutrition        | Liu et al. 2017 <sup>8</sup>          |
| <b><i>Tritonia tetraquetra</i></b>  | Large orange peel nudibranch | Mollusca | Epidermis, stomach and digestive gland | Wild   | Folch et al. 1957 <sup>1</sup>   | LCMS-IT-TOF ESI & MS/MS      | PC, PE, PS, PI, CAEP                         | Lipid molecular species | Marine food webs | Imbs & Chernyshev, 2019 <sup>21</sup> |
| <b><i>Allopora steinegeri</i></b>   | Hydrocoral                   | Cnidaria | Colonies                               | Wild   | Folch et al. 1957 <sup>1</sup>   | LCMS-IT-TOF ESI & MS/MS      | PE, PC, PS, PI, CAEP                         | Lipid molecular species | Ecology          | Imbs et al. 2019 <sup>22</sup>        |
| <b><i>Capnella sp.</i></b>          | Soft Coral                   | Cnidaria | Colonies                               | Wild   | Folch et al. 1957 <sup>1</sup>   | HPLC-HRMS-IT-TOF ESI & MS/MS | PC, PE, PS, PI                               | Lipid molecular species | Ecology          | Imbs et al. 2015 <sup>23</sup>        |
| <b><i>Gersemia fruticose</i></b>    | Hedge carnation coral        | Cnidaria | Colonies                               | Wild   | Folch et al. 1957 <sup>1</sup>   | LCMS-IT-TOF ESI & MS/MS      | PC, PE, PS, PI, CAEP                         | Lipid molecular species | Marine food webs | Imbs & Chernyshev, 2019 <sup>21</sup> |
| <b><i>Gersemia rubiformis</i></b>   | Red soft coral               | Cnidaria | Colonies                               | Wild   | Folch et al. 1957 <sup>1</sup>   | LCMS-IT-TOF-ESI & MS/MS      | PE, PC, PS, PI                               | Lipid molecular species | Ecology          | Imbs & Dang 2017 <sup>24</sup>        |
|                                     |                              | Cnidaria | Colonies                               | Wild   | Folch et al. 1957 <sup>1</sup>   | LCMS-IT-TOF ESI & MS/MS      | PE, PC, PS, PI, CAEP                         | Lipid molecular species | Ecology          | Imbs et al. 2019 <sup>22</sup>        |
| <b><i>Millepora dichotoma</i></b>   | Ramified fire coral          | Cnidaria | Branched fragments                     | Wild   | Folch et al. 1957 <sup>1</sup>   | LCMS-IT-TOF ESI              | PE, PC, PS, PI, CAEP, MGDG, DGDG, SQDG, DGCC | Lipid molecular species | Ecology          | Imbs et al. 2021 <sup>25</sup>        |
|                                     |                              | Cnidaria | Colonies                               | Wild   | Folch et al. 1957 <sup>1</sup>   | LCMS-IT-TOF ESI & MS/MS      | PE, PC, PS, PI, CAEP                         | Lipid molecular species | Ecology          | Imbs et al. 2019 <sup>22</sup>        |
| <b><i>Millepora platyphylla</i></b> | Sheet fire coral             | Cnidaria | Branched fragments                     | Wild   | Folch et al. 1957 <sup>1</sup>   | LCMS-IT-TOF ESI              | PE, PC, PS, PI, CAEP, MGDG, DGDG, SQDG, DGCC | Lipid molecular species | Ecology          | Imbs et al. 2021 <sup>25</sup>        |
| <b><i>Palythoa sp.</i></b>          | Zoantharia                   | Cnidaria | Colonies                               | Wild   | Folch et                         | LCMS-IT-TOF ESI              | PE, PC, PS, PI,                              | Lipid                   | Ecology          | Sikorskaya                            |

|                                      |                           |          |                                               |      |                                                                          |                               |                                                        |                         |                                                  |                                      |
|--------------------------------------|---------------------------|----------|-----------------------------------------------|------|--------------------------------------------------------------------------|-------------------------------|--------------------------------------------------------|-------------------------|--------------------------------------------------|--------------------------------------|
|                                      |                           |          |                                               |      | al. 1957 <sup>1</sup>                                                    |                               | CAEP, SQDG, MGDG, DGDG, DGCC                           | molecular species       |                                                  | 2020 <sup>26</sup>                   |
| <b><i>Paragorgia arborea</i></b>     | Tree bubblegum coral      | Cnidaria | Whole organism                                | Wild | Folch et al. 1957 <sup>1</sup>                                           | LCMS-IT-TOF-ESI & MS/MS       | PE, PC, PI, PS, CAEP                                   | Lipid molecular species | Ecology                                          | Imbs & Velansky, 2021 <sup>27</sup>  |
| <b><i>Pocillopora damicornis</i></b> | Cauliflower coral         | Cnidaria | Coral fragments                               | Wild | Matyash et al. 2008 <sup>7</sup>                                         | LCMS-Q-TOF-ESI                | PC, PE, LPC, LPAF, TG, DG                              | Lipid species           | Global change                                    | Sogin et al. 2016 <sup>28</sup>      |
| <b><i>Rhopilema esculentum</i></b>   | Japanese edible jellyfish | Cnidaria | Umbrella, oral arms and mouth stalk           | Wild | CHCl <sub>3</sub> /CH <sub>3</sub> OH (1:1, v/v) containin g BHT (0.05%) | UPLC-ESI-Q-TOF-ESI-MS & MS/MS | PE, LPE, PI, LPI, PS, PC, LPC, TG, CAEP, Cer           | Lipid molecular species | Nutrition & Fed                                  | Zhu et al. 2015 <sup>29</sup>        |
|                                      |                           | Cnidaria | Coral fraction of the tip and stalk positions | Wild | Folch et al. 1957 <sup>1</sup>                                           | RP-HPLC-TQ-ESI-MS & MS/MS     | PC, LPC                                                | Lipid molecular species | Other: Toxicology                                | Tang et al. 2017 <sup>30</sup>       |
| <b><i>Seriatopora caliendrum</i></b> | Bush coral                | Cnidaria | Organism fraction                             | Wild | Folch et al. 1957 <sup>1</sup>                                           | RP-HPLC-TQ-ESI-MS & MS/MS     | PC, LPC                                                | Lipid molecular species | Ecology: environmental monitoring and assessment | Tang et al. 2018 <sup>31</sup>       |
|                                      |                           | Cnidaria | Organism fraction                             | Wild | Folch et al. 1957 <sup>1</sup>                                           | RP-HPLC-TQ-ESI-MS & MS/MS     | PC, LPC                                                | Lipid molecular species | Ecology: environmental monitoring and assessment | Tang et al. 2019 <sup>32</sup>       |
| <b><i>Sinularia macropodia</i></b>   | Soft Coral                | Cnidaria | Colonies                                      | Wild | Folch et al. 1957 <sup>1</sup>                                           | HPLC-HRMS-IT-TOF ESI & MS/MS  | PC, PE, PS, PI                                         | Lipid molecular species | Ecology                                          | Imbs et al. 2015 <sup>23</sup>       |
| <b><i>Sinularia siaesensis</i></b>   | Soft coral                | Cnidaria | Colonies                                      | Wild | Folch et al. 1957 <sup>1</sup>                                           | LCMS-IT-TOF ESI & MS/MS       | PE, PC, LPC, PS, PI, CAEP, MGDG, DGDG, SQDG            | Lipid molecular species | Ecology                                          | Sikorskaya & Imbs 2018 <sup>33</sup> |
| <b><i>Sinularia sp.</i></b>          | Soft coral                | Cnidaria | Colonies                                      | Wild | Folch et al. 1957 <sup>1</sup>                                           | LCMS-IT-TOF ESI & MS/MS       | PE, LPE, PC, LPC, PS, PI, CAEP, oxPE, MGDG, DGDG, SQDG | Lipid molecular species | Global change                                    | Sikorskaya et al. 2020 <sup>34</sup> |

|                                 |                            |                |             |        |                                           |                                 |                                                  |                         |                           |                                |
|---------------------------------|----------------------------|----------------|-------------|--------|-------------------------------------------|---------------------------------|--------------------------------------------------|-------------------------|---------------------------|--------------------------------|
| <i>Asterias amurensis</i>       | Purple-orange star         | Echinoder mata | Edible part | Market | Folch et al. 1957 <sup>1</sup>            | NPLC/QExactive-MS & MS/MS       | CAEP                                             | Lipid molecular species | Nutrition                 | Wang et al. 2020 <sup>13</sup> |
| <i>Bohadschia marmorata</i>     | Sea cucumber               | Echinoder mata | Edible part | Market | Bligh & Dyer, 1959 <sup>5</sup>           | NPLC-Triple TOF-MS/MS           | PC, PE, PS, PI, PA, PG, LPC, LPE, LPS, LPI, CAEP | Lipid molecular species | Nutrition                 | Wang et al. 2020 <sup>35</sup> |
|                                 |                            | Echinoder mata | Edible part | Market | Svennerholm & Fredman, 1980 <sup>36</sup> | HILIC-Q-Exactive-ESI-MS & MS/MS | GM                                               | Lipid species           | Nutrition; Bioprospection | Wang et al. 2021 <sup>37</sup> |
| <i>Cucumaria frondosa</i>       | Orange-footed Sea cucumber | Echinoder mata | Edible part | Market | Bligh & Dyer, 1959 <sup>5</sup>           | NPLC-Triple TOF-MS/MS           | PC, PE, PS, PI, PA, PG, LPC, LPE, LPS, LPI, CAEP | Lipid molecular species | Nutrition                 | Wang et al. 2020 <sup>35</sup> |
|                                 |                            | Echinoder mata | Edible part | Market | Svennerholm & Fredman, 1980 <sup>36</sup> | HILIC-Q-Exactive-ESI-MS & MS/MS | GM                                               | Lipid species           | Nutrition; Bioprospection | Wang et al. 2021 <sup>37</sup> |
| <i>Glyptocidaris crenularis</i> | Sea urchin                 | Echinoder mata | Gonad       | Market | Matyash et al. 2008 <sup>7</sup>          | HPLC-Qtrap-QqLIT-ESI-MS & MS/MS | PC, LPC, PE, LPE, PS, PI                         | Lipid molecular species | Nutrition                 | Zhou et al. 2018 <sup>38</sup> |
| <i>Holothuria mexicana</i>      | Sea cucumber               | Echinoder mata | Edible part | Market | Bligh & Dyer, 1959 <sup>5</sup>           | NPLC-Triple TOF-MS/MS           | PC, PE, PS, PI, PA, PG, LPC, LPE, LPS, LPI, CAEP | Lipid molecular species | Nutrition                 | Wang et al. 2020 <sup>35</sup> |
|                                 |                            | Echinoder mata | Edible part | Market | Svennerholm & Fredman, 1980 <sup>36</sup> | HILIC-Q-Exactive-ESI-MS & MS/MS | GM                                               | Lipid species           | Nutrition; Bioprospection | Wang et al. 2021 <sup>37</sup> |
| <i>Holothuria polli</i>         | White spot cucumber        | Echinoder mata | Edible part | Market | Bligh & Dyer, 1959 <sup>5</sup>           | NPLC-Triple TOF-MS/MS           | PC, PE, PS, PI, PA, PG, LPC, LPE, LPS, LPI, CAEP | Lipid molecular species | Nutrition                 | Wang et al. 2020 <sup>35</sup> |
|                                 |                            | Echinoder mata | Edible part | Market | Svennerholm & Fredman, 1980 <sup>36</sup> | HILIC-Q-Exactive-ESI-MS & MS/MS | GM                                               | Lipid species           | Nutrition; Bioprospection | Wang et al. 2021 <sup>37</sup> |
| <i>Isostichopus fuscus</i>      | Sea cucumber               | Echinoder mata | Edible part | Market | Bligh & Dyer,                             | NPLC-Triple TOF-MS/MS           | PC, PE, PS, PI, PA, PG, LPC,                     | Lipid molecular         | Nutrition                 | Wang et al. 2020 <sup>35</sup> |

|                                              |                         |                |             |        |                                           |                                        |                                                                                                                                                 |                         |                           |                                |
|----------------------------------------------|-------------------------|----------------|-------------|--------|-------------------------------------------|----------------------------------------|-------------------------------------------------------------------------------------------------------------------------------------------------|-------------------------|---------------------------|--------------------------------|
|                                              |                         |                |             |        | 1959 <sup>5</sup>                         |                                        | LPE, LPS, LPI, CAEP                                                                                                                             | species                 |                           |                                |
|                                              |                         | Echinoder mata | Edible part | Market | Svennerholm & Fredman, 1980 <sup>36</sup> | HILIC-Q-Exactive-ESI-MS & MS/MS        | GM                                                                                                                                              | Lipid species           | Nutrition; Bioprospection | Wang et al. 2021 <sup>37</sup> |
| <b><i>Parastichopus californicus</i></b>     | California sea cucumber | Echinoder mata | Edible part | Market | Bligh & Dyer, 1959 <sup>5</sup>           | NPLC-Triple TOF-MS/MS                  | PC, PE, PS, PI, PA, PG, LPC, LPE, LPS, LPI, CAEP                                                                                                | Lipid molecular species | Nutrition                 | Wang et al. 2020 <sup>35</sup> |
|                                              |                         | Echinoder mata | Edible part | Market | Svennerholm & Fredman, 1980 <sup>36</sup> | HILIC-Q-Exactive-ESI-MS & MS/MS        | GM                                                                                                                                              | Lipid species           | Nutrition; Bioprospection | Wang et al. 2021 <sup>37</sup> |
| <b><i>Strongylocentrotus intermedius</i></b> | Sea urchin              | Echinoder mata | Gonad       | Market | Matyash et al. 2008 <sup>7</sup>          | HPLC-Qtrap-QqLIT-ESI-MS & MS/MS        | PC, LPC, PE, LPE, PS, PI                                                                                                                        | Lipid molecular species | Nutrition                 | Zhou et al. 2018 <sup>38</sup> |
|                                              |                         | Echinoder mata | Gonad       | Wild   | Bligh & Dyer, 1959 <sup>5</sup>           | RP-UPLC-Q-Exactive Plus-ESI-MS & MS/MS | Cer, CerP, CE, CL, DG, DGDG, dMePE, FFA, LdMePE, LPC, LPE, LPG, LPI, LPS, MG, MGDG, MGMG, PA, PAF, PC, PE, PG, phSM, PI, PS, So, SQDG, SQMG, TG | Lipid molecular species | Nutrition Bioprospection  | Wang et al. 2021 <sup>39</sup> |
| <b><i>Strongylocentrotus nudus</i></b>       | Sea urchin              | Echinoder mata | Gonad       | Market | Matyash et al. 2008 <sup>7</sup>          | HPLC-Qtrap-QqLIT-ESI-MS & MS/MS        | PC, LPC, PE, LPE, PS, PI                                                                                                                        | Lipid molecular species | Nutrition                 | Zhou et al. 2018 <sup>38</sup> |
| <b><i>Carcinus maenas</i></b>                | European green crab     | Arthropoda     | Egg mass    | Wild   | Bligh & Dyer, 1959 <sup>5</sup>           | HILIC-LXQ-ESI-MS & MS/MS               | PC, LPC, PE, LPE, SM, PI, CL                                                                                                                    | Lipid molecular species | Ecology                   | Rey et al. 2015 <sup>40</sup>  |
| <b><i>Necora puber</i></b>                   | Velvet swimming crab    | Arthropoda     | Egg mass    | Wild   | Bligh & Dyer, 1959 <sup>5</sup>           | HILIC-LXQ-ESI-MS & MS/MS               | PC, LPC, PE, LPE, SM, PI, CL                                                                                                                    | Lipid molecular species | Ecology                   | Rey et al. 2015 <sup>40</sup>  |
| <b><i>Parapaeneus longirostris</i></b>       | Pink                    | Arthropoda     | Edible      | Market | Bligh &                                   | UHPLC-HILIC-                           | PC, LPC, PE,                                                                                                                                    | Lipid                   | Nutrition                 | Losito et al.                  |

|                                        |               |            |                                          |             |                                 |                                  |                |                         |           |                                 |
|----------------------------------------|---------------|------------|------------------------------------------|-------------|---------------------------------|----------------------------------|----------------|-------------------------|-----------|---------------------------------|
|                                        | shrimp        | a          | part                                     |             | Dyer, 1959 <sup>5</sup>         | ESI-FTMS                         | LPE            | species                 |           | 2018 <sup>6</sup>               |
| <b><i>Portunus trituberculatus</i></b> | Swimming crab | Arthropoda | Muscular tissues of body, claws and legs | Aquaculture | Bligh & Dyer, 1959 <sup>5</sup> | UPLC-HILIC-Q-Trap-ESI-MS & MS/MS | PC, PE, PI, PS | Lipid molecular species | Nutrition | Zhang et al. 2021 <sup>41</sup> |

Abbreviations: BHT – Butylated hydroxytoluene; CAEP – Ceramide aminoethylphosphonate; Car – Carnitine; CE – Cholesteryl ester; Cer – Ceramide; CerP – Ceramide phosphate; CH<sub>2</sub>Cl<sub>2</sub> – Dichloromethane; CHCl<sub>3</sub> – Chloroform; CH<sub>3</sub>OH – Methanol; Chol – Cholesterol; CL – Cardiolipin; CPE – Ceramide phosphoethanolamines; DG – Diacylglycerol; DGCC – Diacylglycerol carboxyhydroxymethylcholine; DGDG – Digalactosyl diacylglycerol; DGMG – Digalactosyl monoacylglycerol; DGTS – Diacylglycerol-N,N,N-trimethyl homoserine; dMePE – Dimethylphosphatidylethanolamine; FFA – Free fatty acids; GM – Ganglioside; Hex2Cer – Dihexosylceramide; HexCer – Hexosylceramide; LdMePE – Lysodimethylphosphatidylethanolamine; LPA – Lyso-phosphatidic acid; LPAF – Lyso-platelet activating factor; LPC – Lyso-phosphatidylcholine; LPE – Lyso-phosphatidylethanolamine; LPG – Lyso-phosphatidylglycerol; LPI – Lyso-phosphatidylinositol; LPnC – Lysophosphonocholine; LPS – Lyso-phosphatidylserine; MADAG – Monoalkyldiacylglycerol; MG – Monoacylglycerol; MGDG – Monogalactosyl diacylglycerol; MGMG – Monogalactosyl monoacylglycerol; MGTS – Monoacylglyceroltrimethylhomoserine; N-CH<sub>3</sub>-CAEP – N-methyl ceramides aminoethylphosphonates; oxPE – Oxidized phosphatidylethanolamine; PA – Phosphatidic acid; PC – Phosphatidylcholine; PE – Phosphatidylethanolamine; PG – Phosphatidylglycerol; phSM – Phytosphingosine; PI – Phosphatidylinositol; PnC – Phosphonocholine; PnE – Phosphonoethanolamine; PS – Phosphatidylserine; SM – Sphingomyelin; So – Sphingosine; SQDG – Sulfolipid sulfoquinovosyl diacylglycerol; SQMG – Sulfoquinovosyl monoacylglycerol; ST – Steroid; TG – Triacylglycerol; WE – Wax esters.



## References

- 1J. Folch, M. Lees and G. H. S. Stanley, A simple method for the isolation and purification of total lipides from animal tissues, *Journal of Biological Chemistry*, 1957, **226**, 497–509.
- 2V. G. Rybin, A. B. Imbs, D. A. Demidkova and E. V. Ermolenko, Identification of molecular species of monoalkyldiacylglycerol from the squid *Berryteuthis magister* using liquid chromatography–APCI high-resolution mass spectrometry, *Chemistry and Physics of Lipids*, 2017, **202**, 55–61.
- 3A. Gilabert, P. Geraudie, J. Jaumot and C. Porte, Partial characterization of the lipidome of the cold-water scallop, *Chlamys islandica*, *Environ Sci Pollut Res*, 2020, **27**, 1475–1484.
- 4C. Y. Chang and W.-X. Wang, A lipidomic approach to understand copper resilience in oyster *Crassostrea hongkongensis*, *Aquatic Toxicology*, 2018, **204**, 160–170.
- 5E. G. Bligh and W. J. Dyer, A rapid method of total lipid extraction and purification, *Canadian Journal of Biochemistry and Physiology*, 1959, **37**, 911–917.
- 6I. Losito, L. Facchini, R. Catucci, C. Calvano, T. Cataldi and F. Palmisano, Tracing the thermal history of seafood products through lysophospholipid analysis by Hydrophilic Interaction Liquid Chromatography–Electrospray Ionization Fourier Transform Mass Spectrometry, *Molecules*, 2018, **23**, 2212.
- 7V. Matyash, G. Liebisch, T. V. Kurzchalia, A. Shevchenko and D. Schwudke, Lipid extraction by methyl-tert-butyl ether for high-throughput lipidomics, *Journal of Lipid Research*, 2008, **49**, 1137–1146.
- 8Z.-Y. Liu, D.-Y. Zhou, Q. Zhao, F.-W. Yin, X.-P. Hu, L. Song, L. Qin, J.-R. Zhang, B.-W. Zhu and F. Shahidi, Characterization of glycerophospholipid molecular species in six species of edible clams by high-performance liquid chromatography-electrospray ionization-tandem mass spectrometry, *Food Chemistry*, 2017, **219**, 419–427.
- 9A. B. Imbs and V. P. Grigorchuk, Lipidomic study of the influence of dietary fatty acids on structural lipids of cold-water nudibranch molluscs, *Sci Rep*, 2019, **9**, 20013.
- 10F. Rey, E. da Costa, A. M. Campos, P. Cartaxana, E. Maciel, P. Domingues, M. R. M. Domingues, R. Calado and S. Cruz, Kleptoplasty does not promote major shifts in the lipidome of macroalgal chloroplasts sequestered by the sacoglossan sea slug *Elysia viridis*, *Scientific Reports*, 2017, **7**, 11502–11502.
- 11F. Rey, T. Melo, P. Cartaxana, R. Calado, P. Domingues, S. Cruz and M. R. M. Domingues, Coping with starvation: contrasting lipidomic dynamics in the cells of two sacoglossan sea slugs incorporating stolen plastids from the same macroalga, *Integrative and Comparative Biology*, 2020, **60**, 43–56.
- 12Y.-Y. Zhang, L. Qin, Y.-X. Liu, D.-Y. Zhou, X.-B. Xu, M. Du, B.-W. Zhu and M. Thornton, Evaluation of lipid profile in different tissues of Japanese abalone *Haliotis discus hannai* Ino with UPLC-ESI-Q-TOF-MS-based lipidomic study, *Food Chemistry*, 2018, **265**, 49–56.
- 13R. Wang, Q. Chen, Y. Song, Y. Ding, P. Cong, J. Xu and C. Xue, Identification of ceramide 2-aminoethylphosphonate molecular species from different aquatic products by NPLC/Q-Exactive-MS, *Food Chemistry*, 2020, **304**, 125425.
- 14Q. Tran, T. Le, M. Pham, T. Do, M. Vu, D. Nguyen, L. Bach, L. Bui and Q. Pham, Fatty acid, lipid classes and phospholipid molecular species composition of the marine clam *Meretrix lyrata* (Sowerby 1851) from Cua Lo Beach, Nghe an province, Vietnam, *Molecules*, 2019, **24**, 895.
- 15F.-W. Yin, D.-Y. Zhou, Q. Zhao, Z.-Y. Liu, X.-P. Hu, Y.-F. Liu, L. Song, X. Zhou, L. Qin, B.-W. Zhu and F. Shahidi, Identification of glycerophospholipid molecular species of mussel (*Mytilus*

- edulis) lipids by high-performance liquid chromatography-electrospray ionization-tandem mass spectrometry, *Food Chemistry*, 2016, **213**, 344–351.
- 16L. Facchini, I. Losito, T. R. I. Cataldi and F. Palmisano, Ceramide lipids in alive and thermally stressed mussels: an investigation by hydrophilic interaction liquid chromatography-electrospray ionization Fourier transform mass spectrometry: Ceramide lipids in mussels: a HILIC-ESI-FTMS study, *J. Mass Spectrom.*, 2016, **51**, 768–781.
- 17F. Rigano, A. Albergamo, D. Sciarrone, M. Beccaria, G. Purcaro and L. Mondello, Nano liquid chromatography directly coupled to electron ionization mass spectrometry for free fatty acid elucidation in mussel, *Anal. Chem.*, 2016, **88**, 4021–4028.
- 18L. Facchini, I. Losito, T. R. I. Cataldi and F. Palmisano, Seasonal variations in the profile of main phospholipids in *Mytilus galloprovincialis* mussels: A study by hydrophilic interaction liquid chromatography-electrospray ionization Fourier transform mass spectrometry, *J Mass Spectrom*, 2018, **53**, 1–20.
- 19I. Losito, L. Facchini, A. Valentini, T. R. I. Cataldi and F. Palmisano, Fatty acidomics: Evaluation of the effects of thermal treatments on commercial mussels through an extended characterization of their free fatty acids by liquid chromatography – Fourier transform mass spectrometry, *Food Chemistry*, 2018, **255**, 309–322.
- 20P. Donato, G. Micalizzi, M. Oteri, F. Rigano, D. Sciarrone, P. Dugo and L. Mondello, Comprehensive lipid profiling in the Mediterranean mussel (*Mytilus galloprovincialis*) using hyphenated and multidimensional chromatography techniques coupled to mass spectrometry detection, *Anal Bioanal Chem*, 2018, **410**, 3297–3313.
- 21A. B. Imbs and A. V. Chernyshev, Tracing of lipid markers of soft corals in a polar lipidome of the nudibranch mollusk *Tritonia tetraquetra* from the Sea of Okhotsk, *Polar Biol*, 2019, **42**, 245–256.
- 22A. B. Imbs, L. P. T. Dang and K. B. Nguyen, Comparative lipidomic analysis of phospholipids of hydrocorals and corals from tropical and cold-water regions, *PLoS ONE*, 2019, **14**, e0215759.
- 23A. B. Imbs, L. P. T. Dang, V. G. Rybin, N. T. Nguyen and L. Q. Pham, Distribution of very-long-chain fatty acids between molecular species of different phospholipid classes of two soft corals, *Biochem Anal Biochem*, 2015, **4**, 205, DOI:10.4172/2161-1009.1000205.
- 24A. B. Imbs and L. T. P. Dang, The molecular species of phospholipids of the cold-water soft coral *Gersemia rubiformis* (Ehrenberg, 1834) (Alcyonacea, Nephtheidae), *Russ J Mar Biol*, 2017, **43**, 239–244.
- 25A. B. Imbs, E. V. Ermolenko, V. P. Grigorchuk and L. T. P. Dang, Seasonal variation in the lipidome of two species of *Millepora* hydrocorals from Vietnam coastal waters (the South China Sea), *Coral Reefs*, 2021, **40**, 719–734.
- 26T. V. Sikorskaya, Investigation of the total lipidome from a Zoantharia *Palythoa* sp., *Chem Nat Compd*, 2020, **56**, 44–49.
- 27A. B. Imbs and P. V. Velansky, Lipidomic profiling reveals biosynthetic relationships between phospholipids and diacylglycerol ethers in the deep-sea soft coral *Paragorgia arborea*, *Sci Rep*, 2021, **11**, 21285.
- 28E. M. Sogin, H. M. Putnam, P. E. Anderson and R. D. Gates, Metabolomic signatures of increases in temperature and ocean acidification from the reef-building coral, *Pocillopora damicornis*, *Metabolomics*, 2016, **12**, 71.
- 29S. Zhu, M. Ye, J. Xu, C. Guo, H. Zheng, J. Hu, J. Chen, Y. Wang, S. Xu and X. Yan, Lipid profile in different parts of edible jellyfish *Rhopilema esculentum*, *J. Agric. Food Chem.*, 2015, **63**, 8283–8291.

- 30C.-H. Tang, C.-Y. Lin, S.-H. Lee and W.-H. Wang, Membrane lipid profiles of coral responded to zinc oxide nanoparticle-induced perturbations on the cellular membrane, *Aquatic Toxicology*, 2017, **187**, 72–81.
- 31C.-H. Tang, C.-Y. Lin, P.-P. Sun, S.-H. Lee and W.-H. Wang, Modeling the effects of Irgarol 1051 on coral using lipidomic methodology for environmental monitoring and assessment, *Science of The Total Environment*, 2018, **627**, 571–578.
- 32C.-H. Tang, S.-H. Shi, C.-Y. Lin, H.-H. Li and W.-H. Wang, Using lipidomic methodology to characterize coral response to herbicide contamination and develop an early biomonitoring model, *Science of The Total Environment*, 2019, **648**, 1275–1283.
- 33T. V. Sikorskaya and A. B. Imbs, Study of total lipidome of the *Sinularia siaesensis* soft coral, *Russ J Bioorg Chem*, 2018, **44**, 712–723.
- 34T. V. Sikorskaya, E. V. Ermolenko and A. B. Imbs, Effect of experimental thermal stress on lipidomes of the soft coral *Sinularia* sp. and its symbiotic dinoflagellates, *Journal of Experimental Marine Biology and Ecology*, 2020, **524**, 151295.
- 35X. Wang, P. Cong, Q. Chen, Z. Li, J. Xu and C. Xue, Characterizing the phospholipid composition of six edible sea cucumbers by NPLC-Triple TOF-MS/MS, *Journal of Food Composition and Analysis*, 2020, **94**, 103626.
- 36L. Svennerholm and P. Fredman, A procedure for the quantitative isolation of brain gangliosides, *Biochimica et Biophysica Acta (BBA) - Lipids and Lipid Metabolism*, 1980, **617**, 97–109.
- 37X. Wang, X. Wang, P. Cong, X. Zhang, H. Zhang, C. Xue and J. Xu, Characterizing gangliosides in six sea cucumber species by HILIC–ESI-MS/MS, *Food Chemistry*, 2021, **352**, 129379.
- 38X. Zhou, D.-Y. Zhou, T. Lu, Z.-Y. Liu, Q. Zhao, Y.-X. Liu, X.-P. Hu, J.-H. Zhang and F. Shahidi, Characterization of lipids in three species of sea urchin, *Food Chemistry*, 2018, **241**, 97–103.
- 39H. Wang, W. Zhao, B. Ding, Y. Zhang, X. Huang, X. Liu, R. Zuo, Y. Chang and J. Ding, Comparative lipidomics profiling of the sea urchin, *Strongylocentrotus intermedius*, *Comparative Biochemistry and Physiology Part D: Genomics and Proteomics*, 2021, **40**, 100900.
- 40F. Rey, E. Alves, T. Melo, P. Domingues, H. Queiroga, R. Rosa, M. R. M. Domingues and R. Calado, Unravelling polar lipids dynamics during embryonic development of two sympatric brachyuran crabs (*Carcinus maenas* and *Necora puber*) using lipidomics, *Scientific Reports*, 2015, **5**, 14549.
- 41Y. Zhang, M. Zhang, L. Dong, J. Chang, H. Wang and Q. Shen, Lipidomics screening of polyunsaturated phospholipid molecular species in crab (*Portunus trituberculatus*) muscular tissue: A nontarget approach by HILIC-MS, *Eur. J. Lipid Sci. Technol.*, 2021, 2100097.
